# Supplementary material for: Particulate emissions from large North American wildfires estimated using a new top-down method
Source: Copernicus journal article supplement (doi:10.5194/acp-17-6423-2017), 2017-05-30
Supplement: Supplementary file 1 [file acp-17-6423-2017-supplement.zip]

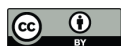

*Supplement of*

## **Particulate emissions from large North American wildfires estimated using a new top-down method**

**Tadas Nikonovas et al.**

*Correspondence to:* Tadas Nikonovas (tadas.nik@gmail.com)

- [acp-17-6423-2017-supplement-title-page.pdf](#)
- [results\\_supplement.xls](#)

The copyright of individual parts of the supplement might differ from the CC-BY 3.0 licence.
