# Supplementary material for: Particulate emissions from large North American wildfires estimated using a new top-down method
Source: Copernicus journal article supplement (doi:10.5194/acp-17-6423-2017), 2017-05-30
Supplement: Supplementary file 1 [file results_supplement.xls]

## Sheet: rasults all
Date	FEER TPM	GFAS TPM	GFAS integrated FRE (W)	QFED PM2.5	TPM this study (not corrected for water content)	Attributed to emission period day1	Emission period day2	Attributed to emission period day3	Difference in estimates (*100 converts to %) between UTC1 and UTC2 emissions periods	Attributed to emission period night1	Attributed to emission period night2	Attributed to emission period night3	This study TPM / Feer TPM	source (1=boreal, 2=temperate)	TPM emission period UTC1	TPM emission period UTC2	AERONET MEE mean	inferred water fraction	firelon	firelat	firesize	firefrp	ef	md	coef
2005-07-14	708.598	803.747	2.93533e+10	1016.46	1299.66	2050.6							3.41622	1	887.056		4.19226	0.1679	-148.671	65.65	18236	81.35	0.0821195	1.0802e+07	30.22
2005-07-20	544.87	1538.69	5.63376e+10	2561.31	854.975	3995.52	957.547	497.983					3.41622	1		979.4	4.19226	0.1679	-148.671	65.65	18236	81.35	0.0472404	2.07322e+07	17.3845
2005-07-21	1179.54	5224.79	1.91298e+11	14571.5	2221.3	1144.22	7938.58		1.06702	30.9556	172.971	11.7134	3.41622	1	1159.72	3812.38	4.19226	0.1679	-148.671	65.65	18236	81.35	0.0353143	7.03978e+07	12.9957
2005-07-22	3784.4	9929.05	3.63547e+11	24476.3	5228.48	16711.8		8067.18		186.617	896.927		3.41622	1	14969.6		4.19226	0.1679	-148.671	65.65	18236	81.35	0.111893	1.33785e+08	41.1766
2005-07-23	3121.27	5726.19	2.09651e+11	12431.8	5045.26		4629.66			4075.31		5566.88	3.41622	1		12093	4.19226	0.1679	-148.671	65.65	18236	81.35	0.156744	7.71516e+07	57.6817
2005-07-24	4231.72	14469.4	5.29771e+11	23545.6	5449.58	11616.9	14882.3	28820.7			342.189		3.41622	1	8115.93		4.19226	0.1679	-148.671	65.65	18236	81.35	0.0416296	1.94956e+08	15.3197
2005-07-25	9872.43	25190.1	9.22302e+11	47184.4	14197.4	35992.5	31742.9		0.263927	1317.05	1911.63	1598.16	3.41622	1	27010.9	35223.6	4.19226	0.1679	-148.671	65.65	18236	81.35	0.0916812	3.39407e+08	33.7387
2005-07-26	8877.95	25483.7	9.33049e+11	46977.8	10380.1	20335.9				5456.95	7833.24		3.41622	1	31339.6		4.19226	0.1679	-148.671	65.65	18236	81.35	0.0912729	3.43362e+08	33.5884
2005-08-01	1792.45	6079.34	2.22588e+11	16078.3	2956.02	7316.67	8482.52		0.0696994	2527.86	4943.35	4298.15	3.41622	1	15844.3	14777.1	4.19226	0.1679	-148.671	65.65	18236	81.35	0.186915	8.19124e+07	68.7849
2005-08-02	749.95	2109.62	7.72388e+10	4308.77	1616	10493	12679.3			1274.48	1683.48	2150.7	3.41622	1	10667.4		4.19226	0.1679	-148.671	65.65	18236	81.35	0.375296	2.84239e+07	138.109
2005-08-03	3650.97	12100	4.4303e+11	31143.2	6570.4	23626.9				2434.34	4008.94		3.41622	1	23952		4.19226	0.1679	-148.671	65.65	18236	81.35	0.146913	1.63035e+08	54.064
2005-06-19	643.233	1525.93	5.58723e+10	624.864	399.495		1396.86						2.76304	1		1455.77	3.79201	0.306316	-136.686	66.0465	512	99.75	0.0708027	2.0561e+07	26.0554
2005-06-20	2023.81	6252.92	2.28942e+11	3548.2	989.274	1726.83				1662.6	2007.27		2.76304	1	3731.76		3.79201	0.306316	-136.686	66.0465	512	99.75	0.0442935	8.42507e+07	16.3
2005-06-24	96.3907	209.303	7.66326e+09	46.0862	105.619	990.446	2123.19	2803.05	0.820564				2.76304	1	484.242	1158.04	3.79201	0.306316	-136.686	66.0465	512	99.75	0.291177	2.82008e+06	107.153
2005-06-25	555.714	1214.76	4.44768e+10	587.008	571.103	1512.63	1772.09	1651.46	0.152451				2.76304	1	1980.61	2307.47	3.79201	0.306316	-136.686	66.0465	512	99.75	0.130994	1.63675e+07	48.2058
2005-06-26	1000.96	2254.77	8.25584e+10	830.138	990.96	3238.17	4026.16	4453.16	0.0294557				2.76304	1	2880.63	2966.75	3.79201	0.306316	-136.686	66.0465	512	99.75	0.0962326	3.03815e+07	35.4136
2005-06-27	1301.62	3163.31	1.15815e+11	1624.4	1047.71	3783.84	5424.74		0.0847918	401.986	1961.97	2082.63	2.76304	1	6152.98	6697.8	3.79201	0.306316	-136.686	66.0465	512	99.75	0.15076	4.262e+07	55.4796
2005-06-28	2616.57	6155.8	2.25384e+11	2166.51	1332.55	6099.95				342.322	1204.66		2.76304	1	7403.03		3.79201	0.306316	-136.686	66.0465	512	99.75	0.0892563	8.29413e+07	32.8463
2005-06-11	493.695	242.635	8.88373e+09	609.175	150.247	605.614	924.436	657.028		127.055	1141.91		1.09668	1	1602.83		4.51026	0.173798	-141.144	65.718	948	93	0.490279	3.26921e+06	180.423
2005-06-12	348.226	180.42	6.60556e+09	175.303	92.8436	809.46	371.165	1085.13	0.571045				1.09668	1	1056.79	587.352	4.51026	0.173798	-141.144	65.718	948	93	0.338183	2.43085e+06	124.452
2005-06-13	571.666	563.258	2.11609e+10	472.347	524.268	110.414	667.099		1.03397				1.09668	1	211.815	665.24	4.51026	0.173798	-141.144	65.718	948	93	0.0563139	7.7872e+06	20.7235
2005-06-14	841.711	645.263	2.4037e+10	633.34	478.112	5.10165				21.627	72.1786		1.09668	1	339.304		4.51026	0.173798	-141.144	65.718	948	93	0.0383584	8.84562e+06	14.1159
2005-06-19	594.889	823.039	3.34282e+10	1164.71	184.199								1.09668	1		721.761	4.51026	0.173798	-141.144	65.718	948	93	0.0586723	1.23016e+07	21.5914
2005-06-20	2411.65	3334.96	1.4796e+11	2430.48	1347.52	3647.33					1027.98		1.09668	1	3304.35		4.51026	0.173798	-141.144	65.718	948	93	0.0606867	5.44493e+07	22.3327
2005-06-25	1526.79	943.403	4.73897e+10	1363.96	689.981	1242.75	426.544	1186.53	0.616708		1691.81	834.363	1.09668	1	3659.69	1934.65	4.51026	0.173798	-141.144	65.718	948	93	0.160394	1.74394e+07	59.0248
2005-06-26	6596.23	6941.56	2.73986e+11	8506.85	2342.92	8751.37	9764.06	9147.79	0.123621	373.984	847.981	1048.96	1.09668	1	5636.77	6379.5	4.51026	0.173798	-141.144	65.718	948	93	0.0595887	1.00827e+08	21.9287
2005-06-27	5163.07	3624.87	1.35977e+11	2511.27	2003.12	6104.72	4888.11		0.178297	3312.05	6375.2	4790.64	1.09668	1	14723	12312.8	4.51026	0.173798	-141.144	65.718	948	93	0.270145	5.00395e+07	99.4135
2005-06-28	14521.3	15054.3	6.37722e+11	13041.3	4107.73	15122.6				1527.86	4310.78		1.09668	1	15805.4		4.51026	0.173798	-141.144	65.718	948	93	0.0673481	2.34682e+08	24.7841
2005-06-12	107.118	399.862	1.67209e+10	253.22	385.698	724.336	419.212	1188.14	0.114988				3.362	1	262.433	233.897			-147.612	66.725	2261	98.8	0.0403305	6.15328e+06	14.8416
2005-06-13	144.857	1917.94	7.04977e+10	2297.93	645.666	261.008	430.202	813.57	0.645403	133.038	154.623	182.357	3.362	1	498.449	973.424			-147.612	66.725	2261	98.8	0.0283673	2.59432e+07	10.4392
2005-06-14	319.182	3859.35	1.41316e+11	4585.13	1522.42	1871.23	1792.04		0.222472	173.653	523.834	343.761	3.362	1	1932.13	1545.32			-147.612	66.725	2261	98.8	0.0334342	5.20044e+07	12.3038
2005-06-15	1009.34	7019.62	2.57019e+11	6728.23	2263.32	4646.58				30.8803	446.911		3.362	1	3576.75				-147.612	66.725	2261	98.8	0.0378159	9.4583e+07	13.9163
2005-06-19	8147.14	16766.5	6.28799e+11	10473.1	530.276		2320.91					1399.5	3.362	1		12552.2			-147.612	66.725	2261	98.8	0.054245	2.31398e+08	19.9622
2005-06-20	3708.87	13794.2	5.05197e+11	18309.7	6016.54	14900.7							3.362	1	9300.11				-147.612	66.725	2261	98.8	0.0500242	1.85912e+08	18.4089
2005-06-23	1375.23	4694.11	1.72274e+11	6358.27	3141.21	8656.17	8486.86	7700.94	0.242036	406.375	844.319	632.699	3.362	1	9301.8	7293.48			-147.612	66.725	2261	98.8	0.130884	6.33968e+07	48.1654
2005-06-24	952.235	5907.44	2.16336e+11	4823.63	2265.25	7258.37	8131.67	6923.66	0.0897881	839.685	1555.2	920.997	3.362	1	8614.57	7874.31			-147.612	66.725	2261	98.8	0.103558	7.96118e+07	38.1094
2005-06-25	678.175	2697.43	9.87662e+10	3643.79	905.875	3045.88	2743.56	3983.01	0.347967	1131.43	2132.65	865.533	3.362	1	8919.53	6275.79			-147.612	66.725	2261	98.8	0.209037	3.6346e+07	76.9257
2005-06-26	1436.04	5403	1.9783e+11	6124.23	3553.84	8044.86	10722.7	10120.4	0.223503	1357.53	2273.27	2666.18	3.362	1	7800.37	9763.11			-147.612	66.725	2261	98.8	0.120626	7.28014e+07	44.3904
2005-06-27	3182.48	11737.4	4.31749e+11	13216.5	5444.98	17999.2	30769.5		0.147322	1476.71	3214.16	3337.95	3.362	1	18958.5	21973.6			-147.612	66.725	2261	98.8	0.128812	1.58883e+08	47.4027
2005-06-28	3574.2	13009.6	4.79837e+11	16605.5	6876.01	28233.6				3542.12	7163.97		3.362	1	39421.1				-147.612	66.725	2261	98.8	0.223248	1.7658e+08	82.1552
2005-08-26	943.687	650.78	9.63845e+10	5338.05	1055.95	3552.69	4432.36	1713.96	0.304147				5.293	2	2765.44	2035.37			-114.753	45.282	636	128.3	0.0676752	3.54695e+07	24.9045
2005-08-27	1686.59	1403.98	1.77258e+11	13488.6	916.982	5517.71	5870.56		0.276902	4.05879	1046.32	969.418	5.293	2	8081.24	6115.66			-114.753	45.282	636	128.3	0.108821	6.52308e+07	40.046
2005-08-28	1191.87	1030.92	1.2707e+11	6618.5	1036.22	7597							5.293	2	7621.96				-114.753	45.282	636	128.3	0.162995	4.67619e+07	59.9822
2005-08-31	563.216	321.499	4.77266e+10	1670.16	299.852		1541.89	1425.09					5.293	2		1434.84			-114.753	45.282	636	128.3	0.0816948	1.75634e+07	30.0637
2005-09-01	1078.87	330.524	7.26897e+10	3914.79	333.619	4246.01	3701.27		0.201009		1545.99	1033.59	5.293	2	5196.78	4247.58			-114.753	45.282	636	128.3	0.176532	2.67498e+07	64.9636
2005-09-02	1970.33	1693.7	2.06144e+11	10331	1091.37	15809.3				1111.31	3695.35		5.293	2	15063.2				-114.753	45.282	636	128.3	0.198563	7.58611e+07	73.0711
2005-09-07	2186.46	2096.47	2.33623e+11	13076.6	917.571	5521.9	25034.9		1.07679		3494.63	12603.9	5.293	2	11624.3	38740.5			-114.753	45.282	636	128.3	0.29291	8.59732e+07	107.791
2005-09-08	3758.48	3454.85	4.18665e+11	20385.1	1211.62	10785.2							5.293	2	12385.4				-114.753	45.282	636	128.3	0.0803887	1.54069e+08	29.5831
2005-07-25	271.252	852.239	3.09926e+10	342.338	1973.95	1408.32	1808.61		0.165025				6.11109	1	862.279	1017.37			-136.505	66.1005	168	74.5	0.0824027	1.14053e+07	30.3242
2005-07-26	417.171	1271.5	4.6539e+10	595.007	2972.53	1987.6				1775.09	1179.12		6.11109	1	3016.11				-136.505	66.1005	168	74.5	0.176109	1.71263e+07	64.8082
2005-08-05	322.105	131.585	2.47704e+10	1707.42	348.426	2949.17	5672.17		0.44359				19.3939	2	2431.87	3818.08			-114.578	47.019	83	79.2	0.34282	9.11551e+06	126.158
2005-08-06	538.879	142.324	3.77917e+10	1793.82	361.489	8873.19				155.853	5538.93		19.3939	2	12317				-114.578	47.019	83	79.2	0.885651	1.39073e+07	325.92
2006-06-13	35.2366	415.658	1.52238e+10	1780.53	780.909	324.706	2843.32		1.59551				4.2878	1	209.721	1864.23	3.85063	0.305458	-108.577	57.932	4665	129.6	0.185097	5.60235e+06	68.1155
2006-06-14	304.223	3586.31	1.31306e+11	7877.07	4432.61	3924.77				103.461	1974.52		4.2878	1	5939.21		3.85063	0.305458	-108.577	57.932	4665	129.6	0.122913	4.83206e+07	45.2318
2006-06-20	634.069	7881.5	2.88526e+11	18070.3	1866.89		571.516	190.486				2323.17	4.2878	1		2821.41	3.85063	0.305458	-108.577	57.932	4665	129.6	0.0265726	1.06178e+08	9.77871
2006-06-21	1809.99	11131.3	4.11701e+11	30190.3	6828.9	7612.78	12501.2	17276	0.352706		550.878	881.819	4.2878	1	7337.51	10479.6	3.85063	0.305458	-108.577	57.932	4665	129.6	0.0588002	1.51506e+08	21.6385
2006-06-22	5955.78	28757.2	1.05335e+12	56561.2	15335.4	12618.8	16744.4		0.255263	1397.35	3766.79	4953.47	4.2878	1	16189.7	20926.9	3.85063	0.305458	-108.577	57.932	4665	129.6	0.0478761	3.87631e+08	17.6184
2006-06-23	2819.59	19636.8	7.19032e+11	35562.8	7245.12	12747				1237.48	3798.17		4.2878	1	18366.9		3.85063	0.305458	-108.577	57.932	4665	129.6	0.0694128	2.64604e+08	25.5439
2006-06-26	13305.9	53306.9	1.96323e+12	71619.7	38219.8	38027.6				1946.79	10906.4		4.2878	1	56526.5		3.85063	0.305458	-108.577	57.932	4665	129.6	0.0782407	7.22469e+08	28.7926
2006-07-02	1131.04	4678.02	2.29364e+11	7280.25	7205.68	2785.04	5562.24				9035.81	13817.9	4.2878	1		18195.4	3.85063	0.305458	-108.577	57.932	4665	129.6	0.21557	8.44058e+07	79.3299
2006-07-03	1821.81	12402.1	5.10553e+11	28854.5	31353.8	22289				204.855	4687.36		4.2878	1	23573.2		3.85063	0.305458	-108.577	57.932	4665	129.6	0.125467	1.87884e+08	46.172
2006-07-22	39.2299	0	2.48295e+09	243.323	14.414					847.125	749.111		2.17201	2	749.111		3.18967	0.49727	-120.037	48.718	2387	113.9	0.819843	913725	301.702
2006-07-24	564.404	0	3.57315e+10	2255.56	108.634	1634.05	6186.04	1827.62	1.22336		1361.06	7344.94	2.17201	2	2929.12	12157	3.18967	0.49727	-120.037	48.718	2387	113.9	0.573651	1.31492e+07	211.104
2006-07-25	1666.01	439.527	1.05429e+11	4756.69	288.163	2355.24	4375.83		0.00740961	778.177	2954.35	2716.85	2.17201	2	6287.31	6334.07	3.18967	0.49727	-120.037	48.718	2387	113.9	0.162656	3.87978e+07	59.8574
2006-07-26	691.707	345.169	4.71532e+10	2712.16	287.331	6302.91				160.638	2896.2		2.17201	2	9211.25		3.18967	0.49727	-120.037	48.718	2387	113.9	0.530835	1.73524e+07	195.347
2006-08-01	206.646	140.547	1.70206e+10	1066.4	117.8				0.448954		9596.9	6078.2	2.17201	2	9596.9	6078.2	3.18967	0.49727	-120.037	48.718	2387	113.9	1.25129	6.26359e+06	460.474
2006-08-02	790.814	500.655	5.96338e+10	3700.68	790.871	5490.96				424.526	3619.63		2.17201	2	8148.34		3.18967	0.49727	-120.037	48.718	2387	113.9	0.371303	2.19452e+07	136.64
2006-08-04	2176.78	1340.84	1.55704e+11	9998.59	771.203	5880.15	9867.68	12735.7			4389.85	4223.02	2.17201	2		15647.2	3.18967	0.49727	-120.037	48.718	2387	113.9	0.273079	5.72992e+07	100.493
2006-08-05	6356.66	4090.35	4.74425e+11	19056.2	1851.7	2926.22	7382.78	5035.44	0.553325	56.1598	2932.41	4845.45	2.17201	2	6995.9	12347.5	3.18967	0.49727	-120.037	48.718	2387	113.9	0.0553972	1.74588e+08	20.3862
2006-08-06	2641.82	1740.75	2.01905e+11	9001.68	1044.64	4643.44	4843.08		0.0323641	161.289	1416.14	1425.66	2.17201	2	6458.29	6670.74	3.18967	0.49727	-120.037	48.718	2387	113.9	0.08835	7.43012e+07	32.5128
2006-08-07	4415.4	2732.83	3.25284e+11	18152.3	2358.76	10412.3				278.274	3989.08		2.17201	2	13600.6		3.18967	0.49727	-120.037	48.718	2387	113.9	0.113618	1.19705e+08	41.8115
2006-08-12	202.202	110.726	1.28257e+10	625.982	135.488							2438.24	2.17201	2		2438.24	3.18967	0.49727	-120.037	48.718	2387	113.9	0.516593	4.71986e+06	190.106
2006-08-13	1597.93	875.561	1.01406e+11	6081.42	609.723	3584.97	4960.07	2310.39	0.296061		1552.09	1950.66	2.17201	2	4323.34	5825.71	3.18967	0.49727	-120.037	48.718	2387	113.9	0.135983	3.73174e+07	50.0417
2006-08-14	4021.83	2205.35	2.58588e+11	13890.4	1811.92	5451.36	9786.79		0.0969777	1594.55	7141	4441.7	2.17201	2	12580.3	11416.7	3.18967	0.49727	-120.037	48.718	2387	113.9	0.126088	9.51603e+07	46.4002
2006-08-15	2612.19	1653.65	1.92304e+11	9838.05	933.308	2662.54	1770.6	1334.12		1187.6	4939.45		2.17201	2	10290		3.18967	0.49727	-120.037	48.718	2387	113.9	0.145405	7.07677e+07	53.5092
2006-08-16	1961.01	1137.23	1.3184e+11	9486.92	870.653	2667.09	1867.87	953.269	0.561745	1613	4772.56	2610.84	2.17201	2	7364.58	4134.74	3.18967	0.49727	-120.037	48.718	2387	113.9	0.118508	4.85171e+07	43.6109
2006-08-17	950.759	552.378	6.39847e+10	3075.83	686.245	449.565	1017.79	856.892	0.00593831	233.314	863.286	731.698	2.17201	2	1856.47	1867.53	3.18967	0.49727	-120.037	48.718	2387	113.9	0.0790779	2.35464e+07	29.1007
2006-08-18	2721.53	1550.25	1.81022e+11	11699.9	1690.3	3729.67	4238.9	3870.24	0.0391248	1536.37	2525.66	2119.62	2.17201	2	5215.56	5015.42	3.18967	0.49727	-120.037	48.718	2387	113.9	0.0767905	6.66161e+07	28.2589
2006-08-19	1780.62	1019.25	1.19732e+11	5261.73	1294.59	3319.88	1823.92	4188.94	0.591482	306.111	2388.44	982.947	2.17201	2	6360.16	3456.86	3.18967	0.49727	-120.037	48.718	2387	113.9	0.111402	4.40613e+07	40.9959
2006-08-20	3941.37	2615.6	3.06527e+11	10100.4	2157.86	4543.96	15449		1.06435	575.839	1354.46	4194.74	2.17201	2	4636.5	15185	3.18967	0.49727	-120.037	48.718	2387	113.9	0.0878596	1.12802e+08	32.3323
2006-08-21	4136.19	2684.91	3.23228e+11	15313.7	1916.47	9268.34				51.0158	9104.19		2.17201	2	22477.3		3.18967	0.49727	-120.037	48.718	2387	113.9	0.188967	1.18948e+08	69.54
2006-08-25	1092.46	844.211	1.00037e+11	7127.06	661.895		1582.68						2.17201	2		1344.06	3.18967	0.49727	-120.037	48.718	2387	113.9	0.0365099	3.68136e+07	13.4357
2006-08-26	858.122	559.591	6.90723e+10	5144.08	400.666	1250.65							2.17201	2	715.112		3.18967	0.49727	-120.037	48.718	2387	113.9	0.0281334	2.54186e+07	10.3531
2006-09-01	1854.62	276.104	1.21261e+11	6554.83	853.428	1395.75	2072.84	21273.4	0.0809045				2.17201	2	1242.08	1346.8	3.18967	0.49727	-120.037	48.718	2387	113.9	0.0290076	4.46242e+07	10.6748
2006-09-02	7512.18	1649.82	4.97574e+11	19402.5	2299.29	2402.69	6079.8	7365	0.841814	19.0743	3005.51	5888.19	2.17201	2	5379.86	13200.4	3.18967	0.49727	-120.037	48.718	2387	113.9	0.0507361	1.83107e+08	18.6709
2006-09-03	9660.42	2612.42	6.58237e+11	22557.8	2378.95	6088.81	11615.6	10480.5	0.476185	1687.71	3617	5435.6	2.17201	2	10350.4	16819.3	3.18967	0.49727	-120.037	48.718	2387	113.9	0.0560822	2.42231e+08	20.6382
2006-09-04	9456.42	4476.21	8.33389e+11	23799.6	1864.08	2992.88	4474.72	4827.9	0.339492	1177.99	9337.24	12942.4	2.17201	2	13007.1	18325.7	3.18967	0.49727	-120.037	48.718	2387	113.9	0.0510826	3.06687e+08	18.7984
2006-09-05	2693.18	1010.71	2.11849e+11	11809.3	1556.56	3431.9	3495.64	5126.7	0.163736	3572.32	5792.26	7008.15	2.17201	2	8663.81	10208.9	3.18967	0.49727	-120.037	48.718	2387	113.9	0.12104	7.79605e+07	44.5427
2006-09-06	1734.83	743.717	1.61123e+11	11783.1	1741.58	5847.65	5566.69	5318.94	0.081511	3488.3	6742.19	5741.85	2.17201	2	11987.4	11048.6	3.18967	0.49727	-120.037	48.718	2387	113.9	0.194255	5.92934e+07	71.4857
2006-09-07	1637.78	753.361	1.44548e+11	9212.91	1097.45	7548.55	13541.6	10569.7	0.481133	1714.58	3563.17	5877.46	2.17201	2	11347.6	18536.7	3.18967	0.49727	-120.037	48.718	2387	113.9	0.2809	5.31937e+07	103.371
2006-09-08	6154.65	3847.74	9.05405e+11	25640.9	3595.68	13910.2	19753.5		0.236857	1483.06	5913.87	7695.33	2.17201	2	20092.8	25491.3	3.18967	0.49727	-120.037	48.718	2387	113.9	0.0684058	3.33189e+08	25.1733
2006-09-09	2112.78	607.848	2.3289e+11	11936.7	421.753								2.17201	2	3461.54		3.18967	0.49727	-120.037	48.718	2387	113.9	0.0403896	8.57037e+07	14.8634
2006-09-10	187.861	122.968	2.68217e+10	789.743	228.969		2090.44						2.17201	2		1681.37	3.18967	0.49727	-120.037	48.718	2387	113.9	0.170345	9.87039e+06	62.6871
2006-09-11	141.838	52.228	1.92812e+10	1414.82	297.734	1364.67					1989.45		2.17201	2	3590.77		3.18967	0.49727	-120.037	48.718	2387	113.9	0.506065	7.09547e+06	186.232
2006-08-20	541.573	381.998	6.99638e+10	6078.16	427.753	1414.01				455.718	884.347		7.09882	2	1741.11		3.14913	0.51794	-115.945	45.06	1536	81.15	0.0676247	2.57467e+07	24.8859
2006-08-25	851.529	887.065	1.071e+11	7344.74	366.796		5098.91	2204.16					7.09882	2		3894.19	3.14913	0.51794	-115.945	45.06	1536	81.15	0.0988058	3.94126e+07	36.3605
2006-08-26	179.997	232.761	2.73375e+10	1648.88	487.139				0.882966		979.791	301.835	7.09882	2	2172.04	841.577	3.14913	0.51794	-115.945	45.06	1536	81.15	0.149779	1.00602e+07	55.1187
2006-08-27	533.602	758.633	9.03323e+10	5167	1020.79	1430	10214		1.60834	1216.39	801.78	9625	7.09882	2	1854.28	17083.4	3.14913	0.51794	-115.945	45.06	1536	81.15	0.284844	3.32423e+07	104.823
2006-08-28	2241.18	2330.69	2.82511e+11	17777.7	1159.2	11165.8				735.232	5567.21		7.09882	2	17195.7		3.14913	0.51794	-115.945	45.06	1536	81.15	0.1654	1.03964e+08	60.8672
2006-09-01	907.063	1081.14	1.33893e+11	9313.34	842.347	2923.55	6382.67	4117.3	0.591245	1373	1369.33	2454.7	7.09882	2	3867.42	7113.68	3.14913	0.51794	-115.945	45.06	1536	81.15	0.111432	4.92727e+07	41.0069
2006-09-02	721.271	951.22	1.10834e+11	7685.07	808.554	4555.82	8255.57	9149.16	0.150589	798.196	2018.05	1599.42	7.09882	2	8132.51	9456.91	3.14913	0.51794	-115.945	45.06	1536	81.15	0.215625	4.07871e+07	79.35
2006-09-03	2444.49	2833	3.28196e+11	23906.2	1966.69	14006	34886.4		0.768692	2291.35	7166.81	14715.3	7.09882	2	20372.7	45809.6	3.14913	0.51794	-115.945	45.06	1536	81.15	0.273987	1.20776e+08	100.827
2006-09-04	1268.38	1557.42	1.86515e+11	12229.8	710.886	7675.05				1477.94	6543.86		7.09882	2	19439.3		3.14913	0.51794	-115.945	45.06	1536	81.15	0.283217	6.86374e+07	104.224
2006-09-07	2007.4	2386.75	3.25934e+11	15154.9	553.169	6914.25	7819.23		0.0209634	1936.86	1511.64	1241.09	7.09882	2	7969.59	8138.43	3.14913	0.51794	-115.945	45.06	1536	81.15	0.0671481	1.19944e+08	24.7105
2006-09-08	889.536	937.317	1.21793e+11	7605.96	525.181	6217.36				3466.04	3093.62		7.09882	2	8960.6		3.14913	0.51794	-115.945	45.06	1536	81.15	0.199925	4.48198e+07	73.5724
2006-09-10	561.254	627.635	7.60258e+10	4951.6	517.983		3355.32	1451.8				936.893	7.09882	2		3469.35	3.14913	0.51794	-115.945	45.06	1536	81.15	0.124005	2.79775e+07	45.6338
2006-09-11	765.257	760.866	9.25897e+10	5252.96	414.223	3085.03	2487.2		0.47923		588.571	261.249	7.09882	2	3919.4	2404.18	3.14913	0.51794	-115.945	45.06	1536	81.15	0.0927945	3.4073e+07	34.1484
2006-09-12	2879.58	2620.47	3.1897e+11	20963	2176.79	7661.46				1964.11	5096.6		7.09882	2	11971.7		3.14913	0.51794	-115.945	45.06	1536	81.15	0.10199	1.17381e+08	37.5322
2006-08-02	26.5962	25.2703	1.231e+10	142.718	189.823	802.088	1003.46	714.95					4.64531	1		845.349			-118.804	65.293	263	82.5	0.186609	4.53006e+06	68.672
2006-08-03	90.2095	146.092	2.42426e+10	543.649	325.507	224.518	1466.85	2301.47	1.14278				4.64531	1	405.505	1486.68			-118.804	65.293	263	82.5	0.106049	8.92127e+06	39.026
2006-08-04	191.959	369.749	3.30646e+10	676.216	551.074	1974.77	1558.05	1453.64	0.282826	15.3082	252.806	326.812	4.64531	1	1460.3	1941.33			-118.804	65.293	263	82.5	0.13978	1.21678e+07	51.4392
2006-08-05	689.974	1454.06	9.80088e+10	1080.09	1169.6	2405	2043.15	2209.55	0.479404	770.589	1459.71	553.1	4.64531	1	4092.32	2509.78			-118.804	65.293	263	82.5	0.091525	3.60672e+07	33.6812
2006-08-06	846.602	1756.2	1.398e+11	1618.95	899.196	1610.18	2645.68		0.314805	68.8226	465.837	587.274	4.64531	1	2003.78	2752.42			-118.804	65.293	263	82.5	0.0462247	5.14466e+07	17.0107
2006-08-07	651.287	1359.8	1.04311e+11	824.332	880.516	2690.17				521.975	2100.85		4.64531	1	5069.58				-118.804	65.293	263	82.5	0.132067	3.83865e+07	48.6006
2006-09-23	2646.33	669.071	7.74782e+10	905.138	753.115		227.093					19.2681	0.277705	2		244.454			-123.189	40.903	223	60.4	0.00857374	2.8512e+07	3.15513
2006-09-24	2911.19	728.332	8.43693e+10	1062.21	1252.65	550.947	701.349		0.0304068		835.54	692.354	0.277705	2	1202.63	1239.76			-123.189	40.903	223	60.4	0.0393327	3.10479e+07	14.4744
2006-09-25	461.122	141.631	1.63914e+10	358.968	178.562					388.773	161.895		0.277705	2	278.719				-123.189	40.903	223	60.4	0.0462065	6.03203e+06	17.004
2006-09-30	842.904	209.661	2.42926e+10	2.1088	384.242	277.981							0.277705	2	265.89				-123.189	40.903	223	60.4	0.0297426	8.93968e+06	10.9453
2006-07-27	162.384	1015.04	3.71616e+10	1889.37	1066.74	3594.7	5884.09		0.269351				2.40888	1	3380.19	4432.35			-108.075	58.949	279	164.1	0.285641	1.36755e+07	105.116
2006-07-28	4197.45	22021.4	8.07176e+11	35425.9	15013.8	10598.4							2.40888	1	9975.17				-108.075	58.949	279	164.1	0.0335818	2.97041e+08	12.3581
2006-08-22	367.994	154.953	1.79456e+10	1017.09	231.371						1774.84		1.36725	2	2092.78				-123.211	41.05	555	65.7	0.316896	6.60398e+06	116.618
2006-08-27	145.312	58.1458	6.73244e+09	15.2992	184.831	261.999	1476.28		1.36772				1.36725	2	235.317	1253.36			-123.211	41.05	555	65.7	0.300435	2.47754e+06	110.56
2006-08-28	1997.96	582.036	6.74116e+10	841.751	898.694	2765.61				261.806	3245.46		1.36725	2	6138.06				-123.211	41.05	555	65.7	0.247428	2.48075e+07	91.0534
2006-08-31	469.517	156.599	1.8138e+10	570.179	148.838							846.528	1.36725	2		883.58			-123.211	41.05	555	65.7	0.132376	6.67479e+06	48.7142
2006-09-01	2159.11	613.884	7.11058e+10	970.894	981.256	1241.73	1584.34	2828.55	0.419091		1144.4	2196.74	1.36725	2	2197.47	3362.55			-123.211	41.05	555	65.7	0.106241	2.61669e+07	39.0968
2006-09-02	1923.37	608.974	7.05371e+10	1917.73	818.706	1266.85	1377.69		0.226718	504.915	1628.91	1959	1.36725	2	2911.98	3656.58			-123.211	41.05	555	65.7	0.126525	2.59577e+07	46.561
2006-09-03	3468.78	1018.63	1.17972e+11	4405.42	1035.35	1721.1				222.96	357.293		1.36725	2	2227.32				-123.211	41.05	555	65.7	0.0513044	4.34137e+07	18.88
2006-09-05	1964.2	521.632	6.04111e+10	789.795	714.787		564.144					266.756	1.36725	2		901.253			-123.211	41.05	555	65.7	0.0405398	2.22313e+07	14.9187
2006-09-06	2604.2	831.747	9.63327e+10	3310.79	1495.54	1215.6					1947.01		1.36725	2	3094.57				-123.211	41.05	555	65.7	0.087293	3.54504e+07	32.1238
2006-09-08	2904.89	774.42	8.96879e+10	1926.8	914.575		4308.7			1536.62		3256.81	1.36725	2		6952.89			-123.211	41.05	555	65.7	0.210661	3.30052e+07	77.5232
2006-09-09	616.236	190.961	2.2114e+10	775.75	258.236	213.807					512.648		1.36725	2	1398.72				-123.211	41.05	555	65.7	0.171876	8.13795e+06	63.2505
2006-08-10	34.1612	7.33133	5.16762e+09	190.82	36.4308	2508.3							4.53233	2	2189.36		2.95933	0.669306	-121.826	44.326	110	96.9	1.15128	1.90168e+06	423.669
2006-08-13	156.566	0.0431255	2.36555e+10	1406.04	95.3193		1254.02						4.53233	2		979.907	2.95933	0.669306	-121.826	44.326	110	96.9	0.112565	8.70522e+06	41.4241
2006-08-14	1473.53	2.24252	2.22586e+11	10397.3	647.294	2769.26					2126.05		4.53233	2	4829.16		2.95933	0.669306	-121.826	44.326	110	96.9	0.0589558	8.19116e+07	21.6957
2006-08-19	749.093	1.25064	1.13169e+11	6238.59	333.205	2665.89	3755.69		0.310878	229.997	2379.43	3361.69	4.53233	2	4659.38	6374.46	2.95933	0.669306	-121.826	44.326	110	96.9	0.132471	4.16462e+07	48.7493
2006-08-20	323.335	0.0862509	4.88597e+10	3029.65	469.602	1934.42				380.062	2175.11		4.53233	2	4631.86		2.95933	0.669306	-121.826	44.326	110	96.9	0.257607	1.79804e+07	94.7992
2007-07-15	2433.22	2213.52	2.78783e+11	16219.9	1299.74	3880.47	8875.66		0.576927	4375.23	7030.17	13024.1	4.94144	2	18065.4	32713.2	4.23995	0.676842	-115.037	45.194	11941	103.4	0.247479	1.02592e+08	91.0722
2007-07-16	9275.87	6303.9	9.06494e+11	14585.5	1940.7	16216.8				1690.47	7853.03		4.94144	2	22338.5		4.23995	0.676842	-115.037	45.194	11941	103.4	0.0669639	3.3359e+08	24.6427
2007-07-22	10154	7412.12	9.77974e+11	32024	3958.38	18581.8					10414.3		4.94144	2	33420.7		4.23995	0.676842	-115.037	45.194	11941	103.4	0.0928626	3.59894e+08	34.1734
2007-07-25	1198.91	791.881	1.01454e+11	3612.82	562.005		2170.71	1647.42				1559.99	4.94144	2		4746.92	4.23995	0.676842	-115.037	45.194	11941	103.4	0.127144	3.73351e+07	46.7888
2007-07-26	1348.36	931.823	1.11822e+11	3140.18	359.259	3141.59	4755.01	9823.78	0.364658		1161.98	2123.1	4.94144	2	4000.99	5785.31	4.23995	0.676842	-115.037	45.194	11941	103.4	0.118909	4.11505e+07	43.7584
2007-07-27	875.999	650.93	8.11193e+10	3607.3	262.377	2540.5	8947.19	10879.7	1.12899	395.118	1299.78	5824.86	4.94144	2	4432.29	15922.5	4.23995	0.676842	-115.037	45.194	11941	103.4	0.34093	2.98519e+07	125.462
2007-07-28	2876.13	1842.29	2.38427e+11	12819.1	1171.48	30969.7	37531.8	35829.4	0.116874	260.828	3033.94	3330.59	4.94144	2	30999.3	34847.2	4.23995	0.676842	-115.037	45.194	11941	103.4	0.375231	8.77411e+07	138.085
2007-07-29	15298.5	13833.7	1.61061e+12	67043.8	6709.35	47515.4	60080.2		0.0704863	10532.8	31159.5	33217	4.94144	2	78629.1	84373.8	4.23995	0.676842	-115.037	45.194	11941	103.4	0.137508	5.92705e+08	50.6028
2007-07-30	5869.83	4734.44	5.51347e+11	36579.7	2690.32	13648.7				4230.02	14933.3		4.94144	2	41437.7		4.23995	0.676842	-115.037	45.194	11941	103.4	0.204231	2.02896e+08	75.1571
2007-08-24	683.87	562.675	6.70153e+10	6040.64	285.424	4385.82	2415.98				915.803	1117.24	4.94144	2		3356.22	4.23995	0.676842	-115.037	45.194	11941	103.4	0.136091	2.46616e+07	50.0814
2007-08-25	4758.62	4347.71	5.0732e+11	25122	2981.17	26799.6				404.63	1925.78		4.94144	2	21985.4		4.23995	0.676842	-115.037	45.194	11941	103.4	0.117762	1.86694e+08	43.3365
2007-08-29	1633.32	1559.69	1.80909e+11	10963.6	1253.55		15476.5						4.94144	2		15210.7	4.23995	0.676842	-115.037	45.194	11941	103.4	0.228477	6.65744e+07	84.0795
2007-08-30	4371.19	4335.97	5.03517e+11	33837.3	3708.83	27317.6					12670.3		4.94144	2	38146.9		4.23995	0.676842	-115.037	45.194	11941	103.4	0.205872	1.85294e+08	75.7608
2007-09-01	856.047	860.114	9.69591e+10	4291.8	347.214	13008.9					2338.16		4.94144	2	13690.3		4.23995	0.676842	-115.037	45.194	11941	103.4	0.383688	3.56809e+07	141.197
2007-09-05	1870.39	1725.66	2.20403e+11	14998	230.117		237.584						4.94144	2		1266.77	4.23995	0.676842	-115.037	45.194	11941	103.4	0.0156182	8.11085e+07	5.7475
2007-09-06	999.885	673.81	9.69017e+10	2880.56	253.962						1326.37		4.94144	2	1464.1		4.23995	0.676842	-115.037	45.194	11941	103.4	0.0410575	3.56598e+07	15.1092
2007-07-14	233.958	3790.61	1.38787e+11	5494.05	1371.12	2354.51	4398.26	3159.33	0.170266				20.575	1	1988.47	2358.55	4.52703	0.136942	-99.0565	56.566	1868	99.35	0.0425563	5.10738e+07	15.6607
2007-07-15	612.581	16177.3	5.92308e+11	11345.6	3193.39	5117.66	10784.6		0.432948				20.575	1	5960.01	9253.29	4.52703	0.136942	-99.0565	56.566	1868	99.35	0.0348978	2.17969e+08	12.8424
2007-07-16	440.724	9861.85	3.61074e+11	9039.5	5467.52	11061.5	16497			331.504	1404.63		20.575	1	12376.2		4.52703	0.136942	-99.0565	56.566	1868	99.35	0.0931414	1.32875e+08	34.276
2007-07-17	493.18	15910.4	5.82534e+11	15109.3	4664.25	7979.58	8289.86			1619.72	2164.27	1373.67	20.575	1	11922.7		4.52703	0.136942	-99.0565	56.566	1868	99.35	0.0556166	2.14372e+08	20.4669
2007-07-18	442.292	11334.4	4.14989e+11	15393.5	5794.22	3642.11				924.217	6196.73		20.575	1	12141.6		4.52703	0.136942	-99.0565	56.566	1868	99.35	0.0795046	1.52716e+08	29.2577
2007-06-13	679.263	3097.02	1.13396e+11	4369.25	4897.18	13021	16815.4	10171	0.287911				5.8487	1	11918.6	15927.1			-71.141	51.304	935	124.2	0.333644	4.17297e+07	122.781
2007-06-14	5329.74	26896.4	9.84767e+11	27260	14470.7	31468.5	33260.3		0.0354568	3713.82	3946.73	4573.61	5.8487	1	34091.6	35322.2			-71.141	51.304	935	124.2	0.0957711	3.62394e+08	35.2438
2007-06-15	5639.04	25282.5	9.25691e+11	41583.5	14970.3	24461.2				1607.32	4423.63		5.8487	1	28562.8				-71.141	51.304	935	124.2	0.0838468	3.40654e+08	30.8556
2007-07-14	3902.32	5386.58	1.9722e+11	2675.24	2083.78		4658.16	4302.32				1788.2	1.86929	1		6551.94			-108.029	61.8935	654	103.05	0.0902758	7.25769e+07	33.2215
2007-07-15	1516.65	3068.97	1.12366e+11	1812.54	1701.27	3011.66	3003.74		0.00668578		546.249	440.442	1.86929	1	3403.14	3425.97			-108.029	61.8935	654	103.05	0.0825752	4.13508e+07	30.3877
2007-07-16	1028.03	2785.1	1.01971e+11	1277.85	1577.42	1568.3	4450.56			611.506	1135.42	3165.54	1.86929	1	3195.96				-108.029	61.8935	654	103.05	0.085168	3.75254e+07	31.3418
2007-07-17	2541.6	4979.08	1.82303e+11	1636.24	2157.66	5349.13							1.86929	1	5029.97				-108.029	61.8935	654	103.05	0.0749763	6.70875e+07	27.5913
2007-07-01	884.323	2572.57	9.4183e+10	3221.15	2193.38	7491.97	9684.38	15717	0.0713329				4.30016	1	6874.4	6400.92			-105.697	57.4755	82	160.35	0.191511	3.46594e+07	70.4762
2007-07-02	3632.41	9882.46	3.61834e+11	14923	9116.59	6354.08	12038.8		0.390298	677.497	7003.44	8311.94	4.30016	1	15167.2	22522.2			-105.697	57.4755	82	160.35	0.141525	1.33155e+08	52.0811
2007-07-03	4276.46	11578.4	4.23927e+11	7535.28	5237.56	10174.9				400.901	4147.47		4.30016	1	15064.2				-105.697	57.4755	82	160.35	0.096562	1.56005e+08	35.5348
2007-07-13	28.0643	25.552	2.95286e+09	103.359	35.0106		3318.71	2335.04					29.5026	2		2634.92			-122.726	41.821	61	61.9	2.4248	1.08665e+06	892.327
2007-07-14	312.164	283.511	3.28378e+10	1533.78	515.72	6974.24	7242.08		0.318523		2754.77	5640.33	29.5026	2	8528.59	11759.7			-122.726	41.821	61	61.9	0.83945	1.20843e+07	308.918
2007-07-15	338.816	466.085	5.40109e+10	3062.09	337.11	4058.63				707.086	4396.02		29.5026	2	8985.24				-122.726	41.821	61	61.9	0.452064	1.9876e+07	166.36
2008-06-10	8245.77	8278.03	3.03172e+11	6740.34	634.115		11225.8	267.01		6478.7		5502.6	3.2005	2		16728.4	3.88675	0.520808	-76.424	35.677	851	63.9	0.14994	1.11567e+08	55.1779
2008-06-11	2350.24	2362.39	8.64176e+10	1276.2	186.064	12971	17283.2	20672.7	0.23659		4275.21	3916.33	3.2005	2	15831	20078.9	3.88675	0.520808	-76.424	35.677	851	63.9	0.564591	3.18017e+07	207.77
2008-06-12	2722.66	2733.78	1.0009e+11	1240.63	369.47	10354.5	17907.7		0.558595	5251.07	7838.78	14386.1	3.2005	2	18535.6	32902.1	3.88675	0.520808	-76.424	35.677	851	63.9	0.698255	3.6833e+07	256.958
2008-06-13	1644.29	1654.8	6.04559e+10	1308.25	189.91	6878.45				797.364	3285.68		3.2005	2	10647.1		3.88675	0.520808	-76.424	35.677	851	63.9	0.47857	2.22478e+07	176.114
2008-06-22	4198.57	1523.92	1.83284e+11	10233.7	1231.12	13314.1	18786.9	13535.1	0.557245				2.70249	2	9088.49	16109.1	3.38006	0.352654	-122.892	40.4775	4120	59.9	0.186791	6.74486e+07	68.7391
2008-06-23	9954.79	3768.37	4.86617e+11	37074.3	5629.6	20514.9	22558.3	19852.9	0.0294963	10736.6	14104.2	14272.1	2.70249	2	30323.3	31231.1	3.38006	0.352654	-122.892	40.4775	4120	59.9	0.171868	1.79075e+08	63.2473
2008-06-24	5653.36	2441.25	3.00623e+11	17307.3	1737.1	11423	15593.7		0.03744	9704.47	8989.25	9218.17	2.70249	2	22825.7	23696.6	3.38006	0.352654	-122.892	40.4775	4120	59.9	0.210262	1.10629e+08	77.3765
2008-06-25	6632.96	2680.07	3.4515e+11	21513.8	2950.15	28120.2				11252.8	14845.2		2.70249	2	39861.1		3.38006	0.352654	-122.892	40.4775	4120	59.9	0.31383	1.27015e+08	115.489
2008-07-01	2650.6	1059.85	1.26398e+11	7001.09	1641.57	9763.71	7715.32		0.255316				2.70249	2	9839.1	7611.41	3.38006	0.352654	-122.892	40.4775	4120	59.9	0.187581	4.65146e+07	69.0298
2008-07-02	4127.55	1454.43	1.89726e+11	10151.3	4247.47	8531.25				947.76	3836.5		2.70249	2	11428.3		3.38006	0.352654	-122.892	40.4775	4120	59.9	0.163684	6.98191e+07	60.2356
2008-07-04	1795.89	995.329	1.2013e+11	10322	1860.12	8790.33		8189.59			5041.94		2.70249	2	13100.5		3.38006	0.352654	-122.892	40.4775	4120	59.9	0.296339	4.4208e+07	109.053
2008-07-05	1261.1	535.307	6.61823e+10	5760.09	884.927		2448.72	808		901.597		1176.77	2.70249	2		5410.33	3.38006	0.352654	-122.892	40.4775	4120	59.9	0.222144	2.43551e+07	81.7489
2008-07-06	1938.18	870.312	1.03814e+11	6599.1	1792.22	4901.36	2989.26		0.429247				2.70249	2	3999.91	2586.34	3.38006	0.352654	-122.892	40.4775	4120	59.9	0.0861998	3.82034e+07	31.7215
2008-07-07	1938.18	870.312	1.03814e+11	18846.8	4517.33	11690.5				2758.47	3663.97		2.70249	2	13963.2		3.38006	0.352654	-122.892	40.4775	4120	59.9	0.365496	3.82034e+07	134.503
2008-07-09	20989.9	7404.24	9.66207e+11	67762.4	15424.9	33767.9				18426.9	21748.3		2.70249	2	50882.1		3.38006	0.352654	-122.892	40.4775	4120	59.9	0.143103	3.55564e+08	52.6617
2008-07-11	17434	4372.06	7.14496e+11	45219	10183.5	22967.7					15483.4		2.70249	2	35231.6		3.38006	0.352654	-122.892	40.4775	4120	59.9	0.133994	2.62935e+08	49.3097
2008-07-13	2525.75	600.366	9.60691e+10	5778.12	2055.31		10381.7					3828.64	2.70249	2		12847.6	3.38006	0.352654	-122.892	40.4775	4120	59.9	0.363406	3.53534e+07	133.733
2008-07-14	2257.27	609.771	8.86327e+10	5479.35	2210.26	8101.94	7549.78				9936.13	8896.74	2.70249	2	18391.2		3.38006	0.352654	-122.892	40.4775	4120	59.9	0.563856	3.26168e+07	207.499
2008-07-15	1438.23	433.472	5.25367e+10	4276.91	1488.22	13101.2				2122.71	4381.64		2.70249	2	17410.5		3.38006	0.352654	-122.892	40.4775	4120	59.9	0.900536	1.93335e+07	331.397
2008-07-18	5940.61	1708.04	2.09104e+11	13435.4	4140.25	7967.28	18885		0.782787		6032.54	13662.2	2.70249	2	12991.6	29701.3	3.38006	0.352654	-122.892	40.4775	4120	59.9	0.277406	7.69502e+07	102.085
2008-07-19	2298.02	701.287	8.53648e+10	6191.77	1389.24	3599.5				3382.37	6106.62		2.70249	2	14062.5		3.38006	0.352654	-122.892	40.4775	4120	59.9	0.447648	3.14143e+07	164.735
2008-07-22	4284.08	1108.59	1.43213e+11	6830.09	2356.11		9937.59	11677.4				1553.73	2.70249	2		9677.01	3.38006	0.352654	-122.892	40.4775	4120	59.9	0.183616	5.27023e+07	67.5708
2008-07-23	5383.8	1487.86	1.79459e+11	11435	3851.5	3327.73	6966.01	7200.29	0.519947		7325.92	11888.9	2.70249	2	11984.4	20404.7	3.38006	0.352654	-122.892	40.4775	4120	59.9	0.24522	6.6041e+07	90.241
2008-07-24	1367.16	377.187	4.4311e+10	1530.58	662.318	2513.52	1176.69	1398.85	0.161024	5078.81	3266.66	2144.3	2.70249	2	6052.11	5150.19	3.38006	0.352654	-122.892	40.4775	4120	59.9	0.343493	1.63065e+07	126.405
2008-07-25	3256.42	827.938	9.8192e+10	10043.1	3503.92	9982.24	16016.3		0.311157	3164.36	4722.05	5638.13	2.70249	2	13151.4	17997.6	3.38006	0.352654	-122.892	40.4775	4120	59.9	0.431013	3.61347e+07	158.613
2008-07-26	2040.65	622.764	7.38724e+10	3592.51	1076.41	6962.92	5281.76			1047.21	3589.77	1699.83	2.70249	2	12849.6		3.38006	0.352654	-122.892	40.4775	4120	59.9	0.472671	2.7185e+07	173.943
2008-07-27	2480.13	781.762	9.08809e+10	6645.55	2001.06	3004.1				1026.27	3108.78		2.70249	2	7028.97		3.38006	0.352654	-122.892	40.4775	4120	59.9	0.21017	3.34442e+07	77.3427
2008-08-01	3381.98	1363.27	1.61702e+11	9702.07	2703.71	3756.9	4873.14	6140.07	0.114991	1241.11	3216.16	2355.97	2.70249	2	8802.65	7845.46	3.38006	0.352654	-122.892	40.4775	4120	59.9	0.139885	5.95063e+07	51.4778
2008-08-02	610.259	242.37	2.87299e+10	1480.66	383.916	938.768	818.348		0.0693834	525.445	1765.27	1048.58	2.70249	2	4204.24	3922.32	3.38006	0.352654	-122.892	40.4775	4120	59.9	0.384321	1.05726e+07	141.43
2008-08-03	2311.11	908.011	1.10524e+11	6014.96	1554.8	2191.92				937.316	1330.72		2.70249	2	3426.56		3.38006	0.352654	-122.892	40.4775	4120	59.9	0.0842471	4.06728e+07	31.0029
2008-08-05	6448.04	2000.25	2.4328e+11	17870.9	2906.87		8415.38	10511.9				2199.33	2.70249	2		10064.1	3.38006	0.352654	-122.892	40.4775	4120	59.9	0.112413	8.95271e+07	41.3682
2008-08-06	2584.29	931.868	1.11674e+11	9274.57	1481.78	3595.88	2502.77		0.383522		5836.17	3207.19	2.70249	2	10160.8	6890.96	3.38006	0.352654	-122.892	40.4775	4120	59.9	0.207462	4.10962e+07	76.346
2008-08-07	1588.13	583.929	6.8102e+10	8835.31	1009.95	2683.65				1727.99	2694.56		2.70249	2	5173.95		3.38006	0.352654	-122.892	40.4775	4120	59.9	0.20645	2.50615e+07	75.9736
2008-08-09	886.626	282.12	3.34022e+10	1826.32	443.435	1353.4							2.70249	2	3318.91		3.38006	0.352654	-122.892	40.4775	4120	59.9	0.270006	1.2292e+07	99.3622
2008-08-12	528.601	170.305	2.03436e+10	1393.28	750.552	2576.39							2.70249	2	1957.19		3.38006	0.352654	-122.892	40.4775	4120	59.9	0.261431	7.48646e+06	96.2065
2008-07-15	77.148	1151.49	4.21602e+10	2087.77	121.631	1073.47	1060.78	1880.77	0.539178				3.37495	1	418.349	727.168			-115.139	62.414	1923	113.6	0.0369166	1.55149e+07	13.5853
2008-07-16	1402.91	4392.55	1.60827e+11	6174.59	667.689	1606.5	542.268		0.324254				3.37495	1	1209.4	871.953			-115.139	62.414	1923	113.6	0.0175836	5.91844e+07	6.47076
2008-07-17	1515.57	10075.7	3.68907e+11	7685.18	3777.9	10300.7				564.617	867.067		3.37495	1	5593.12				-115.139	62.414	1923	113.6	0.0411992	1.35758e+08	15.1613
2008-07-26	8027.8	18228.6	6.67418e+11	28785.2	7550.03	17672.8		22162.1			12638.6		3.37495	1	29356.8				-115.139	62.414	1923	113.6	0.119526	2.4561e+08	43.9857
2008-07-27	7291.92	20996.9	7.6878e+11	40945.3	11233.7		16624.5			2892.8		2905.74	3.37495	1		22243.8			-115.139	62.414	1923	113.6	0.0786248	2.82911e+08	28.9339
2008-07-28	2150.6	7963.24	2.91554e+11	11645.9	7970.34	7771.65							3.37495	1	8893.55				-115.139	62.414	1923	113.6	0.0828912	1.07292e+08	30.504
2008-07-16	107.031	673.615	2.46625e+10	4137.36	687.759	840.18	896.161	1142.38	0.132299				2.22217	1	576.163	657.788	4.41662	0.499344	-108.1	59.465	2081	128.7	0.0679802	9.07581e+06	25.0167
2008-07-17	409.836	2650.94	9.70601e+10	6675.29	1957.28	5806.72	3365.53		0.470347	249.073	1340.61	895.536	2.22217	1	5391.98	3338.74	4.41662	0.499344	-108.1	59.465	2081	128.7	0.122217	3.57181e+07	44.9758
2008-07-18	511.487	4973.55	1.82104e+11	20849.4	3635.49	16208.7							2.22217	1	12165.4		4.41662	0.499344	-108.1	59.465	2081	128.7	0.181535	6.70142e+07	66.8048
2008-07-23	1582.57	6728.84	2.5568e+11	15349.1	2904.93		5369.68	6688.73				2407.65	2.22217	1		8178.07	4.41662	0.499344	-108.1	59.465	2081	128.7	0.0869173	9.40902e+07	31.9856
2008-07-24	3887.45	12885.2	5.37285e+11	32678.2	6795.57	24414.8	28750		0.160826		2509.37	3471.56	2.22217	1	22869.4	26869.1	4.41662	0.499344	-108.1	59.465	2081	128.7	0.125779	1.97721e+08	46.2868
2008-07-25	17357	24069.5	1.03793e+12	78718.8	17638.1	62178.5				4585.76	8176.45		2.22217	1	59864.1		4.41662	0.499344	-108.1	59.465	2081	128.7	0.15673	3.81957e+08	57.6766
2008-07-27	27271.1	39959	1.75658e+12	84341.3	17287.5	34831.1				13319.7	13203.9		2.22217	1	44203.7		4.41662	0.499344	-108.1	59.465	2081	128.7	0.0683821	6.46422e+08	25.1646
2008-07-26	23.8884	18.0947	2.1111e+09	2809.7	55.0889	3363.18							4.3497	2	3003.93				-109.797	44.548	371	133.2	3.86665	776883	1422.93
2008-07-28	1248.09	946.681	1.1045e+11	5269.31	229.995	5425.11	7828.94		0.206473				4.3497	2	5406.84	6651.72			-109.797	44.548	371	133.2	0.148338	4.06456e+07	54.5883
2008-07-29	1198.67	912.123	1.06066e+11	5666.34	114.638	8102.34				154.918	1844.81		4.3497	2	10824.3				-109.797	44.548	371	133.2	0.277316	3.90323e+07	102.052
2008-08-16	72.2287	70.9273	8.2241e+09	1158.11	131.103	943.788	3529.14	4879.48	0.354523		1630.67	1341.88	4.81697	2	2293.42	3281.67			-114.658	45.776	138	68.45	0.921057	3.02647e+06	338.949
2008-08-17	288.557	286.267	3.31563e+10	4117.68	227.456	1793.96	5458.72		0.561951				4.81697	2	2771.78	4938.05			-114.658	45.776	138	68.45	0.315938	1.22015e+07	116.265
2008-08-18	2397.09	2488.62	2.88472e+11	18758	783.953	13915.9				394.866	1388.05		4.81697	2	11176.5				-114.658	45.776	138	68.45	0.105282	1.06158e+08	38.7436
2008-07-13	2597.26	1302.08	1.95291e+11	10163.9	181.128	1695.62	5682.17	6400.94	0.829443				2.40093	2	1627.7	3934.43			-121.443	46.113	57	145.5	0.0386974	7.18669e+07	14.2406
2008-07-14	1039.15	573.353	7.81196e+10	3838.77	593.125	5405.42	2594.68		0.363754	247.735	6453.04	4970.14	2.40093	2	12211.1	8452.81			-121.443	46.113	57	145.5	0.359397	2.8748e+07	132.258
2008-07-15	459.007	286.803	3.45192e+10	899.505	122.635					1373.26	3472.68		2.40093	2	4103.82				-121.443	46.113	57	145.5	0.323057	1.27031e+07	118.885
2009-07-10	874.033	776.807	3.07404e+10	1119.1	972.775	1349.14	575.79	1349.02	1.11501				4.45451	1	779.902	221.575	4.1398	0.20969	-149.807	64.454	4369	95.1	0.0442643	1.13125e+07	16.2893
2009-07-11	626.705	2675.83	1.04401e+11	3615.03	3145.04	5881.62	7029.64	8325.16	0.0501442	315.396	521.908	471.668	4.45451	1	4345.59	4569.1	4.1398	0.20969	-149.807	64.454	4369	95.1	0.116018	3.84194e+07	42.6946
2009-07-12	2319.44	2902.88	1.30537e+11	5555.47	5796.58	6968	5358		0.044552	535.377	1541.49	2129.62	4.45451	1	8087.35	7734.89	4.1398	0.20969	-149.807	64.454	4369	95.1	0.164685	4.80378e+07	60.6042
2009-07-13	6193.34	10038	5.1059e+11	25182.8	14804.8	28525.3				3213.56	3045.26		4.45451	1	18151		4.1398	0.20969	-149.807	64.454	4369	95.1	0.0966009	1.87897e+08	35.5491
2009-07-16	333.246	1904.16	7.53776e+10	6535.85	1022.98		6218.42	5995.17					4.45451	1		3110.63	4.1398	0.20969	-149.807	64.454	4369	95.1	0.11214	2.7739e+07	41.2673
2009-07-17	1338.98	6420.71	2.9983e+11	12117.4	7474.6	7344.21	14201	20829.6	0.278098				4.45451	1	7286.35	9639.93	4.1398	0.20969	-149.807	64.454	4369	95.1	0.0767022	1.10338e+08	28.2264
2009-07-18	728.706	3688.68	1.57048e+11	5498.28	4482.74	2007.92	1657.12	4218.9	0.27927	3113.43	4672.88	5318.43	4.45451	1	12731.2	16863.7	4.1398	0.20969	-149.807	64.454	4369	95.1	0.25604	5.77935e+07	94.2226
2009-07-19	1109.69	24029.3	8.84794e+11	18629.6	8531.91	20324.7	21957.5		0.535722	414.107	804.491	1181.12	4.45451	1	8070.54	13975.9	4.1398	0.20969	-149.807	64.454	4369	95.1	0.0338547	3.25604e+08	12.4585
2009-07-20	724.98	5728.75	2.07114e+11	7188.75	2669.04					4273.03	2564.45		4.45451	1	13682.1		4.1398	0.20969	-149.807	64.454	4369	95.1	0.179512	7.6218e+07	66.0606
2009-07-24	1616.69	5630.81	2.20087e+11	13883.5	4693.51	10788.5					3889.59		4.45451	1	15416.1		4.1398	0.20969	-149.807	64.454	4369	95.1	0.190341	8.09921e+07	70.0456
2009-07-27	2177.37	12542.8	4.69894e+11	16076.5	8866.15	7025.39					36757		4.45451	1	48630.3		4.1398	0.20969	-149.807	64.454	4369	95.1	0.281229	1.72921e+08	103.492
2009-07-27	90.8564	2193.89	8.03277e+10	761.267	554.991	2652.25	4645.9	4581.56	0.511016				25.6436	1	1799.79	3035.16			-135.039	61.876	1363	103.2	0.0817803	2.95606e+07	30.0951
2009-07-28	72.3364	1692.92	6.19828e+10	1267.5	904.731	4998.21	4733.8	5265.28	0.107685	1628.83	1673.13	1615.32	25.6436	1	6249.77	5611.15			-135.039	61.876	1363	103.2	0.259997	2.28097e+07	95.6791
2009-07-29	130.801	2672.57	9.78601e+10	2614.49	1563.73	4736.8	6300.07		0.205643	696.997	1461.08	2156.3	25.6436	1	6496.59	7985.68			-135.039	61.876	1363	103.2	0.201073	3.60125e+07	73.9948
2009-07-30	286.209	4459.32	1.63278e+11	3028.58	2076.69	9585.17				694.364	2704.21		25.6436	1	10429.1				-135.039	61.876	1363	103.2	0.173568	6.00864e+07	63.8729
2009-08-03	308.397	2820.23	1.03255e+11	1074.17	1189.58		2204.77					1470.11	25.6436	1		2832.53			-135.039	61.876	1363	103.2	0.0745442	3.7998e+07	27.4323
2009-08-04	709.925	6457.24	2.36429e+11	3719.08	3881.99	22917.8					2633.77		25.6436	1	18021.9				-135.039	61.876	1363	103.2	0.207134	8.7006e+07	76.2251
2009-07-16	3471.06	5162.91	1.8903e+11	5446.19	1521.42		4719.22	5910.51					1.726	1		3942.28	4.39311	0.570404	-143.831	66.106	4243	103.5	0.056672	6.95631e+07	20.8553
2009-07-17	8494.54	14848.1	5.43646e+11	21622.5	4286.18	7888.39	13679.5		0.375219		432.475	512.509	1.726	1	6735.41	9846.29	4.39311	0.570404	-143.831	66.106	4243	103.5	0.0414415	2.00062e+08	15.2505
2009-07-18	3302.24	6058.85	2.21838e+11	8854.61	447.923	2039.86	1762.09	2283.24		2159.98	3115.56	1981.67	1.726	1	11108.3		4.39311	0.570404	-143.831	66.106	4243	103.5	0.136071	8.16363e+07	50.0741
2009-07-19	1349.05	2722.26	9.96669e+10	7569	1259.82	2973.7	5519.93		0.474107	592.369	591.843	1052.25	1.726	1	3483.56	5648.3	4.39311	0.570404	-143.831	66.106	4243	103.5	0.124489	3.66774e+07	45.8119
2009-07-20	6377.85	11223.4	4.10932e+11	20534.6	3907.97	7958.05				266.099	823.328		1.726	1	6943.12		4.39311	0.570404	-143.831	66.106	4243	103.5	0.0459131	1.51223e+08	16.896
2009-07-23	8448.51	18628.2	6.82042e+11	18063.6	1705.65		6775.96	11314.9					1.726	1		4667.04	4.39311	0.570404	-143.831	66.106	4243	103.5	0.0185944	2.50991e+08	6.84275
2009-07-24	2919.16	5669.04	2.07559e+11	11981.6	1021.36	8549	10323.6		0.0970522		1062.19	1183.65	1.726	1	8770.99	9665.65	4.39311	0.570404	-143.831	66.106	4243	103.5	0.120687	7.63818e+07	44.4129
2009-07-25	2983.32	4821.21	1.76522e+11	10042.7	2133.19	6611.02				13493.2	9891.38		1.726	1	19511.3		4.39311	0.570404	-143.831	66.106	4243	103.5	0.300358	6.49602e+07	110.532
2009-08-03	9874.05	7929.05	2.90317e+11	9790.79	5867.9	24554.8					23933.6		1.726	1	45157.4		4.39311	0.570404	-143.831	66.106	4243	103.5	0.422677	1.06837e+08	155.545
2009-07-01	15.0779	449.704	1.64644e+10	283.698	267.077	1072.73	8172.82		1.51132				37.205	1	753.868	5416.83	3.82184	0.573286	-149.903	64.576	673	98.6	0.509224	6.05892e+06	187.395
2009-07-02	142.463	3654.52	1.33803e+11	3746.4	1671.77	4315.41		8011.78		557.984	1245.68		37.205	1	6071.12		3.82184	0.573286	-149.903	64.576	673	98.6	0.123298	4.92395e+07	45.3736
2009-07-03	300.603	7748.82	2.83714e+11	10457.9	5103.48	10970.4	13325.2	17278.1		800.305	1640.37	874.27	37.205	1		11770.5	3.82184	0.573286	-149.903	64.576	673	98.6	0.112737	1.04407e+08	41.4871
2009-07-04	217.764	4361.02	1.59672e+11	12622.8	4573.67	9959.44	12856.2	11710.8	0.267481				37.205	1	12089.8	15822.8	3.82184	0.573286	-149.903	64.576	673	98.6	0.237517	5.87591e+07	87.4062
2009-07-05	245.651	6599.77	2.41635e+11	11033.4	5067.51	6921.42	14193.1	8149.99	0.249201	2829.6	6002.35	7302.76	37.205	1	15963.7	20508.1	3.82184	0.573286	-149.903	64.576	673	98.6	0.205077	8.89219e+07	75.4685
2009-07-06	263.039	8635.02	3.16156e+11	11203.8	2214.88	3267.38	2661.62		0.625576	1556.81	1491.68	555.954	37.205	1	11137	5829.93	3.82184	0.573286	-149.903	64.576	673	98.6	0.072916	1.16346e+08	26.8331
2009-07-07	434.593	8459.94	3.09748e+11	10094.4	8785.45	5958.06				219.168	1254.55		37.205	1	5579.52		3.82184	0.573286	-149.903	64.576	673	98.6	0.0489487	1.13987e+08	18.0131
2009-08-18	89.5857	1645.68	1.90599e+11	11088.5	3546.74	8551.25					1012.74		3.71477	1	9223.46				-123.835	51.888	691	123.9	0.1315	7.01405e+07	48.392
2009-08-27	5394.94	18734	2.16431e+12	54067	8093.61		23134.6	11774.6					3.71477	1		18790.4			-123.835	51.888	691	123.9	0.0235922	7.96468e+08	8.68193
2009-08-28	1907.13	5695.3	6.57754e+11	26540.6	1941.05				0.0790055		6070.52	5935.24	3.71477	2	10650.5	9841.06			-123.835	51.888	691	123.9	0.0423286	2.42053e+08	15.5769
2009-08-29	872.019	1542.98	1.76962e+11	9133.1	3273.27	2090.63				1856.07	1932.25		3.71477	1	3610.51				-123.835	51.888	691	123.9	0.0554423	6.51219e+07	20.4028
2009-07-30	8.05326	24.8508	2.88972e+09	134.068	33.864	2378.78	5165.36	2764.85	0.286253				14.9562	2	2042.49	2724.82	4.64596	0.338322	-119.602	50.082	191	115.9	2.24151	1.06342e+06	824.874
2009-07-31	50.0933	157.861	1.8338e+10	1451.03	97.6396	4518.69	12422.9	8638.92	0.597753				14.9562	2	5019.93	9299.74	4.64596	0.338322	-119.602	50.082	191	115.9	1.06097	6.74837e+06	390.438
2009-08-01	51.4808	298.363	1.86604e+10	1157.7	167.623	11626.3	11689.3		0.252134	869.977	9837.18	7153.62	14.9562	2	23911.7	18557.7	4.64596	0.338322	-119.602	50.082	191	115.9	3.09227	6.86701e+06	1137.96
2009-08-02	1057.77	2099.16	4.35323e+11	16321.1	1598.45	6232.35		10566.2		1939.73	5619.64		14.9562	2	12051.1		4.64596	0.338322	-119.602	50.082	191	115.9	0.0752259	1.60199e+08	27.6831
2009-08-03	355.042	892.622	1.44961e+11	7152.53	1422.52		1745.45			4829.99		4928.72	14.9562	2		9094.86	4.64596	0.338322	-119.602	50.082	191	115.9	0.170489	5.33458e+07	62.7398
2009-08-04	170.414	420.712	6.84465e+10	4434.07	229.973						2869.22		14.9562	2	3560.38		4.64596	0.338322	-119.602	50.082	191	115.9	0.141351	2.51883e+07	52.017
2009-08-07	227.746	475.505	9.2391e+10	7957.1	631.647	5662.06					7544.83		14.9562	2	11694.1		4.64596	0.338322	-119.602	50.082	191	115.9	0.343946	3.39999e+07	126.572
2009-08-26	188.271	127.943	1.21413e+10	653.167	72.3261	602.094	3744.86	1861.76	1.56016				1.65878	2	345.757	2798.61			-121.893	51.049	253	102.3	0.351877	4.46799e+06	129.491
2009-08-27	4828.56	2427.04	2.56448e+11	14247.5	1806.9	9725.32	7942.6	3997.6	0.278566				1.65878	2	8725.53	6592.06			-121.893	51.049	253	102.3	0.0811546	9.43729e+07	29.8649
2009-08-28	3617.14	1925.28	2.09926e+11	16379.5	2112.37	7324.13	8727.85	6576.38	0.137489	1177.45	6055.91	7368.21	1.65878	2	14685.8	16854			-121.893	51.049	253	102.3	0.204133	7.72529e+07	75.1211
2009-08-29	4526.46	2771.34	2.75041e+11	13290	2595.03	2079.29	2142.98		0.184413	2520.69	4055.67	2882.21	1.65878	2	6048.78	5027.48			-121.893	51.049	253	102.3	0.0547164	1.01215e+08	20.1356
2009-08-30	1184.2	913.029	1.14601e+11	5920.14	1253.43	2249.57				759.078	775.32		1.65878	2	3051.27				-121.893	51.049	253	102.3	0.072351	4.21732e+07	26.6252
2009-07-27	233.949	69.4002	6.02394e+09	491.319	205.818	1672.54	2548.27		0.113257				2.49286	1	1086.22	969.787			-140.538	63.893	171	81.3	0.46373	2.21681e+06	170.653
2009-07-28	1563.95	112.587	4.02148e+10	2295.56	632.01	1872.3				316.275	1088.1		2.49286	1	3832.18				-140.538	63.893	171	81.3	0.258948	1.4799e+07	95.2928
2009-07-03	257.159	528.813	1.93631e+10	994.508	522.146		6105.23	6062.66					3.9667	1		2113.8			-155.348	61.9575	286	90.45	0.296648	7.12562e+06	109.166
2009-07-04	207.855	484.885	1.7754e+10	458.424	305.732	1760.2	1792.07	1124.5	0.0167058				3.9667	1	4815.8	4736.02			-155.348	61.9575	286	90.45	0.730993	6.53345e+06	269.005
2009-07-05	336.72	525.329	1.92362e+10	770.22	595.98	1319.01	2338.8		0.229844	1572.11	1290.75	1755.04	3.9667	1	2771.76	3491.55			-155.348	61.9575	286	90.45	0.442391	7.07894e+06	162.8
2009-07-06	867.79	2110.4	7.72703e+10	5644.12	1121.31	2043.25							3.9667	1	2299.44				-155.348	61.9575	286	90.45	0.0808653	2.84355e+07	29.7584
2009-07-10	515.359	777.113	2.84517e+10	1357.07	889.345	1069.11	1251.73	2209.15	0.800702		2774.22	758.14	3.9667	1	3416.12	1462.83			-155.348	61.9575	286	90.45	0.232991	1.04702e+07	85.7409
2009-07-11	1377.18	1277.62	6.54163e+10	5860.32	1541.53	1766.33	3570.09		0.929622	528.708	533.152	1926.12	3.9667	1	1838.8	5032.79			-155.348	61.9575	286	90.45	0.142723	2.40732e+07	52.522
2009-07-12	1626.49	1695	8.31825e+10	3747.34	1958.36	5261.82				1933.95	3657.52		3.9667	1	7771.81				-155.348	61.9575	286	90.45	0.253888	3.06111e+07	93.4309
2009-08-02	312.636	74.9091	2.84362e+10	256.15	55.2735	846.641	1301.87		0.0263347				4.37433	2	759.746	780.021			-121.48	40.8265	192	102.05	0.0735707	1.04645e+07	27.074
2009-08-03	1305.19	740.844	1.54989e+11	6789.12	756.601	5534.77				22.771	966.944		4.37433	2	5852.49				-121.48	40.8265	192	102.05	0.10261	5.7036e+07	37.7607
2009-08-01	248.833	434.117	5.20162e+10	2702.98	566.655	3914.9	3646.54		0.0216587	1119.92	7707.99	8624.7	29.2864	1	11318.4	11566.3	3.50055	0.558782	-122.071	50.717	150	93.85	0.597763	1.9142e+07	219.977
2009-08-02	288.63	463.101	5.96052e+10	2820.29	889.242	1827.67				947.053	2977.75		29.2864	2	4870.93		3.50055	0.558782	-122.071	50.717	150	93.85	0.222065	2.19347e+07	81.7199
2009-07-31	39.3188	9.99764	2.93347e+10	6088.75	335.028	5219.85	4232.01	4611.34	0.119709				55.0561	1	3650.85	3238.49			-125.834	52.211	128	100.4	0.319093	1.07952e+07	117.426
2009-08-01	121.589	0.588096	9.07273e+10	5107.23	567.55	2497.08	6839.76		0.463432				55.0561	1	3156.47	5060.47			-125.834	52.211	128	100.4	0.123054	3.33876e+07	45.2837
2009-08-02	74.4274	389.614	5.55485e+10	2240.63	625.276	4213.12				16.6366	1810.66		55.0561	1	7645.68				-125.834	52.211	128	100.4	0.374021	2.04419e+07	137.64
2009-07-16	948.727	2631.07	9.63367e+10	5925.45	964.559	6170.8	4969.96		0.407786				4.86066	1	4568.19	3020.84	3.57635	0.492084	-135.05	62.129	72	109.1	0.107033	3.54519e+07	39.3881
2009-07-17	359.898	1169.3	4.28146e+10	2310.85	559.871	2328				584.313	1007.31		4.86066	1	3902.82		3.57635	0.492084	-135.05	62.129	72	109.1	0.247707	1.57558e+07	91.1562
2010-08-11	345.004	401.642	4.07907e+10	1545.9	362.625		2777.15						3.31735	2		2039.04	3.39656	0.587142	-125.003	53.244	2728	107.45	0.135837	1.5011e+07	49.9879
2010-08-12	1739.08	3533.39	2.2881e+11	14525.3	1475	10447.7		27.162			2256.6		3.31735	2	12725.9		3.39656	0.587142	-125.003	53.244	2728	107.45	0.151135	8.42022e+07	55.6176
2010-08-13	4296.16	8550.68	4.46921e+11	33425.8	4241.97	5658.19	3411.31	3316.45		257.176	1709.06	723.904	3.31735	1		1992.11	3.39656	0.587142	-125.003	53.244	2728	107.45	0.0121125	1.64467e+08	4.45741
2010-08-14	11679.5	24237.1	1.09582e+12	46634.7	5406.69	11713.2	13622.9		0.164511	1105.09	3321.87	4505.38	3.31735	1	15045	17741.9	3.39656	0.587142	-125.003	53.244	2728	107.45	0.0406521	4.03262e+08	14.96
2010-08-15	4605.79	9266.8	4.71918e+11	28519.8	4138.21	22736.9		24337		4064.68	6402.59		3.31735	1	27985.6		3.39656	0.587142	-125.003	53.244	2728	107.45	0.161146	1.73666e+08	59.3019
2010-08-16	11537.2	26273.9	1.42833e+12	53649.1	8885.05	18346	41429.2			6102.04		20326.2	3.31735	1		52669.6	3.39656	0.587142	-125.003	53.244	2728	107.45	0.100203	5.25627e+08	36.8748
2010-08-17	4472.27	8415.01	4.73994e+11	28063.4	4451.01	9174.43				3238.85	11973.7		3.31735	2	31985.2		3.39656	0.587142	-125.003	53.244	2728	107.45	0.18337	1.7443e+08	67.4803
2010-07-22	510.157	2479.53	9.07822e+10	6922.84	2513.4	2221.16	3892.12		0.471385				5.43643	1	1889.09	3054.19			-109.9	58.407	332	179.8	0.0739838	3.34079e+07	27.226
2010-07-23	1472.16	16249.7	5.94963e+11	28421.2	6044.4	8160.08				161.503	758.137		5.43643	1	8107.86				-109.9	58.407	332	179.8	0.0370312	2.18946e+08	13.6275
2010-07-19	2104.19	2218.99	8.12469e+10	5100.9	2495.32	9389.54		5463.13					1.57158	1	7610.38				-104.261	57.241	475	102.7	0.254538	2.98988e+07	93.6698
2010-07-20	1476.69	3492.05	1.00866e+11	4816.38	4589.02		3925.11	7481.59		1739.86		3837.04	1.57158	1		8165.78			-104.261	57.241	475	102.7	0.219991	3.71187e+07	80.9567
2010-07-21	1379.89	2509.31	7.34001e+10	4153.72	1439.66	4386.84	8442.61	5002.83	0.527875		3362.56	4403.71	1.57158	1	7173.7	12318.4			-104.261	57.241	475	102.7	0.360814	2.70112e+07	132.78
2010-07-22	1910.51	3515.98	1.26733e+11	6832.92	4114.01	2874.97	1682.91		0.623006	4101.28	6690.69	3467.46	1.57158	1	10450.2	5486.01			-104.261	57.241	475	102.7	0.17085	4.66379e+07	62.8729
2010-07-23	2360.21	6985.37	2.43348e+11	11384.5	6559.5	9192.24				2930.65	2545.05		1.57158	1	9142.35				-104.261	57.241	475	102.7	0.10209	8.95522e+07	37.5689
2010-07-27	6100.12	5758.74	2.1077e+11	8064.58	4323.43	8992.67							1.57158	1	7363.11				-104.261	57.241	475	102.7	0.0949302	7.75634e+07	34.9343
2010-07-30	2102.99	4640.38	1.69944e+11	5035.71	5508.02								1.57158	1		5388.85			-104.261	57.241	475	102.7	0.0861674	6.25393e+07	31.7096
2010-07-31	6512.4	5073.35	1.88176e+11	5808.05	1691.35	6561.94	4080.53		0.568087				1.57158	1	5647.51	3148.93			-104.261	57.241	475	102.7	0.0635132	6.92489e+07	23.3729
2010-08-01	4803.01	4856.81	2.03871e+11	8663.29	5786.54	7805.98							1.57158	1	6869.42				-104.261	57.241	475	102.7	0.0915622	7.50246e+07	33.6949
2010-07-29	99.928	2132.58	7.80743e+10	0	577.919	1271.34	2332.5		0.0174369	1123.35	4004.1	3264.9	92.3182	1	4514.86	4436.82			-129.223	59.811	509	108.4	0.155783	2.87313e+07	57.328
2010-07-30	99.928	2132.58	7.80743e+10	140.901	1302.97	3437.91				3197.66	4639.73		92.3182	1	7460.94				-129.223	59.811	509	108.4	0.25968	2.87313e+07	95.5621
2010-08-02	348.676	7439.92	2.72402e+11	6620.45	1015.21		26578.9	21629.6					92.3182	1		32445.4			-129.223	59.811	509	108.4	0.323664	1.00244e+08	119.108
2010-08-03	191.324	4082.71	1.49484e+11	3261.4	2959.86	4588.07	14306		0.539296		10002.8	21351.2	92.3182	1	24275.6	42200.8			-129.223	59.811	509	108.4	0.60422	5.50101e+07	222.353
2010-08-04	151.797	3238.76	1.18584e+11	5867.15	2366.34	8093.86				2097.41	2288.12		92.3182	1	11620.5				-129.223	59.811	509	108.4	0.266287	4.36389e+07	97.9938
2010-07-20	32.6374	382.596	1.40069e+10	358.604	176.201	1176.42		805.1					11.2505	1	866.992				-108.335	60.209	503	123.7	0.168199	5.15455e+06	61.8973
2010-07-21	64.4654	584.996	2.1419e+10	625.207	255.296								11.2505	1		247.112			-108.335	60.209	503	123.7	0.0313507	7.88219e+06	11.537
2010-07-22	312.703	2974.76	1.08919e+11	5238.4	1483.71	2298.36	3529.27		0.156459		3248.6	3315.58	11.2505	1	4991.26	5838.46			-108.335	60.209	503	123.7	0.135094	4.00821e+07	49.7147
2010-07-23	586.689	5535.33	2.03444e+11	9255.89	2531.11	4827.06				373.614	936.982		11.2505	1	5767.2				-108.335	60.209	503	123.7	0.077032	7.48675e+07	28.3478
2010-07-26	867.77	3715.95	1.35853e+11	4666.5	924.726	4183.06	4686.58	4883.97	0.0210545				11.2505	1	6933.98	7081.52			-108.335	60.209	503	123.7	0.140173	4.99938e+07	51.5835
2010-07-27	635.804	6460.82	2.28165e+11	9883.61	3171.88	8305.18	15196.1		0.551192	170.575	919.898	2132.42	11.2505	1	9653.3	16998.4			-108.335	60.209	503	123.7	0.158708	8.39646e+07	58.4046
2010-07-28	369.279	2746.88	9.47915e+10	2808.04	1725.51	1373.83				353.241	1680.67		11.2505	1	5098.63				-108.335	60.209	503	123.7	0.146162	3.48833e+07	53.7878
2010-07-11	1282.51	11474.7	4.21941e+11	25424.1	9553.51	16020.8	11395.3	17575.6	0.361785		2490.53	1559.83	7.91925	1	15164.9	10518.9	3.84515	0.528892	-105.986	58.72	1312	140.4	0.0827044	1.55274e+08	30.4352
2010-07-12	1314.07	17396.3	6.37164e+11	31940	10424.3	17506.1	19328.4	16855.8	0.287951	2049.03	2727.1	3020.76	7.91925	1	16901.4	22586.8	3.84515	0.528892	-105.986	58.72	1312	140.4	0.0842051	2.34476e+08	30.9875
2010-07-13	8782.79	86821	3.26909e+12	72501.8	37439.3	47159.3	56471.2		0.0726768	9915.46	21147.8	17586.7	7.91925	1	64901.2	60349.8	3.84515	0.528892	-105.986	58.72	1312	140.4	0.0520567	1.20302e+09	19.1569
2010-07-14	3780.56	28523.2	1.0712e+12	39050.1	15324.3	23097.2				1247.91	5666.19		7.91925	1	41876.6		3.84515	0.528892	-105.986	58.72	1312	140.4	0.106231	3.94203e+08	39.0931
2010-05-26	560.45	2030.31	7.43374e+10	3597.93	552.394	743.299	1152.59	1288.55		169.049	705.26		9.40888	1	1356.49				-150.987	64.228	337	90.4	0.0495861	2.73562e+07	18.2477
2010-05-27	252.506	1110.57	5.11567e+10	1805.92	1115.77	5963.23	6779.24		0.092002				9.40888	1	3395.01	3722.42			-150.987	64.228	337	90.4	0.189035	1.88257e+07	69.565
2010-05-28	713.743	3837.07	1.43318e+11	4174.36	2093.4	7456.34				543.059	2331.04		9.40888	1	9372.54				-150.987	64.228	337	90.4	0.177709	5.27409e+07	65.397
2010-08-03	9.95915	476.756	1.74539e+10	547.119	225.061	1536.67	2224.95	1291.38	0.634417				261.53	1	800.002	1543.33			-130.118	60.755	78	84.65	0.182416	6.42305e+06	67.129
2010-08-04	23.2495	1111.72	4.0704e+10	1748.65	491.902	5582.03	2808.79		0.504356	647.042	1703.48	1165.58	261.53	1	5113.58	3053.91			-130.118	60.755	78	84.65	0.27263	1.49791e+07	100.328
2010-08-05	16.7417	800.646	2.9312e+10	759.797	576.851	7523.82				1179.48	2591.8		261.53	1	8003.69				-130.118	60.755	78	84.65	0.741987	1.07868e+07	273.051
2010-07-22	477.364	1230	4.50389e+10	2888.66	1654.41				0.516089	1782.39	2449.26	1444.5	3.31952	1	2449.26	1444.5			-104.853	59.039	182	155.75	0.117464	1.65743e+07	43.2267
2010-07-23	1012.38	3342.22	1.22367e+11	7660.71	4216.57	3524							3.31952	1	3189.81				-104.853	59.039	182	155.75	0.070836	4.50309e+07	26.0676
2010-07-08	996.291	2896.69	1.06059e+11	11236	1733.77	6685.12							1.76175	1	6331.52				-104.498	57.266	182	117.6	0.162223	3.90297e+07	59.6981
2010-07-11	2475.01	3974.25	1.45516e+11	6207.33	5976.07		9063.02	8587.28					1.76175	1		6374.71			-104.498	57.266	182	117.6	0.119042	5.355e+07	43.8075
2010-07-12	4957.41	9064.43	3.26025e+11	16238.8	8666.03	8230.12	9343.3	8241.88	0.173687		2280.03	1442.55	1.76175	1	10675.7	8969.64			-104.498	57.266	182	117.6	0.0818713	1.19977e+08	30.1286
2010-07-13	10871.7	12537.8	4.46145e+11	12714.2	7434.66	9456.98	3954.6	1948.59	0.45221	1065.93	14096.6	9411.63	1.76175	1	23051.5	14549.7			-104.498	57.266	182	117.6	0.114511	1.64181e+08	42.1401
2010-07-14	1721.74	2064.22	7.08711e+10	4922.09	245.842				0.545803				1.76175	1	866.887	495.178			-104.498	57.266	182	117.6	0.0261126	2.60806e+07	9.60945
2010-07-15	5125.04	4557.13	1.53825e+11	12076.8	4567.09	5608.47				2374.64	3160.98		1.76175	1	7939.51				-104.498	57.266	182	117.6	0.140255	5.66077e+07	51.6138
2010-08-06	47.4037	288.225	1.05585e+10	0.0136092	177.49	4370.52	4725.09	5312.91	0.214157				5.70532	1	3327.89	4126.05			-102.281	58.154	71	110.3	0.959191	3.88554e+06	352.982
2010-08-07	324.955	1277.51	4.72468e+10	216.478	842.292	7875.64	7856.93		0.0814206				5.70532	1	7027.5	6477.7			-102.281	58.154	71	110.3	0.388374	1.73868e+07	142.922
2010-08-08	1382.73	4457.9	1.70526e+11	2931.94	2693.03	6962.57							5.70532	1	6619.2				-102.281	58.154	71	110.3	0.105479	6.27537e+07	38.8163
2010-08-07	11.8765	377.564	1.38243e+10	1124.93	239.041	4663.55	8356.45		0.0803624		7712.86	5993.8	416.075	1	11393.4	12347.3			-100.445	57.5345	24	56.9	2.33332	5.08733e+06	858.66
2010-08-08	17.716	590.518	2.06219e+10	1297.94	361.516	2236.97							416.075	1	2726.22				-100.445	57.5345	24	56.9	0.35924	7.58886e+06	132.2
2010-07-10	79.1402	279.326	1.02274e+10	510.37	482.556	1474.56	2070.69	1081.45	0.183295				3.64764	1	846.646	1017.49			-106.995	57.1125	32	238.05	0.247649	3.76367e+06	91.1347
2010-07-11	951.371	7242.3	2.65166e+11	7255.06	2175.63	4203.75	2962.7		0.413093				3.64764	1	3838.42	2524.23			-106.995	57.1125	32	238.05	0.0326018	9.75811e+07	11.9975
2010-07-12	174.565	1235.17	4.5221e+10	4452.52	664.727	5038.72							3.64764	1	2965.97				-106.995	57.1125	32	238.05	0.178229	1.66413e+07	65.5883
2010-06-22	65.57	0	5.14669e+09	1413.71	1111.95	2128.72	2168.2		0.272661				4.93611	1	1758.34	1336.43			-104.619	56.416	35	99.2	0.817002	1.89398e+06	300.657
2010-06-23	118.113	119.562	9.29021e+09	196.439	843.971	4045.1	2368.53						4.93611	1	4246.79				-104.619	56.416	35	99.2	1.24219	3.4188e+06	457.126
2010-06-24	805.078	42.2382	6.3387e+10	2780.77	2865.2	1356				1029.18	1967.3		4.93611	1	3516.27				-104.619	56.416	35	99.2	0.150742	2.33264e+07	55.473
2011-05-19	23295.9	14977.7	5.61866e+11	26123.7	7797.43	8903.46					3454.56		0.291401	1	10658		3.85574	0.24924	-111.316	57.7735	2746	137.95	0.051546	2.06767e+08	18.9689
2011-05-24	59692.8	19480.9	8.51365e+11	39224.6	5659.85	13017.7	10697.7		0.212846	543.084	2107.54	1577.35	0.291401	1	13247	10698.6	3.85574	0.24924	-111.316	57.7735	2746	137.95	0.0382147	3.13302e+08	14.063
2011-05-25	23039.3	7281.58	3.37189e+11	15855	4338.27	5956.04	9182.9			1066.65	1758.18	1924.73	0.291401	1	8580.83		3.85574	0.24924	-111.316	57.7735	2746	137.95	0.0691525	1.24086e+08	25.4481
2011-05-26	18760	6660.78	2.74832e+11	13559.7	3740.23	6380.37				1035.02	2238.34		0.291401	1	9391.66		3.85574	0.24924	-111.316	57.7735	2746	137.95	0.0928598	1.01138e+08	34.1724
2011-05-29	16226.8	2865.8	2.44023e+11	21163.3	3869.26	5401.08	10209.8	8129.53		251.695	537.016	1296.86	0.291401	1	7327.08		3.85574	0.24924	-111.316	57.7735	2746	137.95	0.0815928	8.98005e+07	30.0262
2011-05-30	5867.99	3346.55	1.58271e+11	12657.2	2963.77	4172.11	3925.7		0.224197	530.631	1338.83	1079.6	0.291401	1	7381.35	5893.28	3.85574	0.24924	-111.316	57.7735	2746	137.95	0.113958	5.82437e+07	41.9365
2011-05-31	7802.6	4072.88	2.04481e+11	12825.7	4236.83	8412.27				482.812	646.515		0.291401	1	8139.03		3.85574	0.24924	-111.316	57.7735	2746	137.95	0.108162	7.52489e+07	39.8034
2011-06-03	467.342	603.269	2.967e+10	1175.13	68.8272					801.536	6318.52		15.5162	2	6318.52				-82.268	30.86	933	90.1	0.578695	1.09186e+07	212.96
2011-06-06	462.01	264.049	2.62321e+10	1712.11	33.4975							8162.84	15.5162	2		8162.84			-82.268	30.86	933	90.1	0.845591	9.65342e+06	311.177
2011-06-08	617.688	608.321	3.38617e+10	1080.67	35.2437	4425.48		11340.4					15.5162	2	4442.6				-82.268	30.86	933	90.1	0.356517	1.24611e+07	131.198
2011-06-09	1078.1	908.439	5.83847e+10	3345.37	70.3477		11782.5			803.487		11333.3	15.5162	2		22198.3			-82.268	30.86	933	90.1	1.03317	2.14856e+07	380.207
2011-06-11	272.98	254.934	1.53234e+10	884.7	9.59688		3529.8						15.5162	2		3162.62			-82.268	30.86	933	90.1	0.560847	5.63902e+06	206.392
2011-06-12	931.179	1327.7	5.39366e+10	4449.73	57.3203	6774.06					5159.54		15.5162	2	11653.8				-82.268	30.86	933	90.1	0.587131	1.98487e+07	216.064
2011-09-02	272.713	262.608	3.04158e+10	1757.21	145.011	682.336		245.919					5.79656	2	326.486		2.82133	0.487528	-113.909	46.2075	300	78.2	0.0291687	1.1193e+07	10.7341
2011-09-03	351.681	337.958	3.96564e+10	2753.2	225.295		1273.43	8283.34					5.79656	2		996.035	2.82133	0.487528	-113.909	46.2075	300	78.2	0.0682517	1.45936e+07	25.1166
2011-09-04	654.036	625.702	7.2523e+10	4343.11	279.857	3593.98	17167.5	7343.89	1.32766		668.069	4079.99	5.79656	2	3949.98	19550	2.82133	0.487528	-113.909	46.2075	300	78.2	0.440266	2.66885e+07	162.018
2011-09-05	1932.97	1852.79	2.15513e+11	11992.6	730.732	10667.6	11328.5	24842.8	0.111292	601.222	3301.99	2659.24	5.79656	2	15286.8	13675.2	2.82133	0.487528	-113.909	46.2075	300	78.2	0.18259	7.9309e+07	67.1929
2011-09-06	1905.68	1788.85	2.07271e+11	11135.8	649.09	2850.38	9351.98	5237.36	0.830615	364.239	1533.3	2644.57	5.79656	2	6122.33	14819.7	2.82133	0.487528	-113.909	46.2075	300	78.2	0.137279	7.62756e+07	50.5186
2011-09-07	2421.23	2327.24	2.69543e+11	14435.2	1012.88	7078.83	10101	8175.67	0.0725663	728.636	2420.38	1879.5	5.79656	2	10083.6	10842.9	2.82133	0.487528	-113.909	46.2075	300	78.2	0.105485	9.91918e+07	38.8185
2011-09-08	1454.29	1399.92	1.62309e+11	9507.68	723.647	1359.82	1179.83	1709.88	0.21732	3042.61	3530.73	2722.04	5.79656	2	6075.53	4884.6	2.82133	0.487528	-113.909	46.2075	300	78.2	0.0917477	5.97298e+07	33.7631
2011-09-09	286.117	284.816	3.29949e+10	1645.45	179.953				0.716494				5.79656	2	214.22	453.388	2.82133	0.487528	-113.909	46.2075	300	78.2	0.0274914	1.21421e+07	10.1168
2011-09-10	1588.12	1559.14	1.80618e+11	9032.28	722.133	5415	11944.3	16200.4	0.494411	1048.27	4168.78	5810.29	5.79656	2	8474.86	14040.9	2.82133	0.487528	-113.909	46.2075	300	78.2	0.169374	6.64673e+07	62.3298
2011-09-11	589.849	578.744	6.96627e+10	5039.45	220.552	3581.65	5862.1		0.277733	514.6	2427.16	3253.09	5.79656	2	8883.44	11748.5	2.82133	0.487528	-113.909	46.2075	300	78.2	0.402404	2.56359e+07	148.085
2011-09-12	1062.79	1038.47	1.22018e+11	7630.57	563.068	5056.69				383.876	1738.88		5.79656	2	6577.41		2.82133	0.487528	-113.909	46.2075	300	78.2	0.146481	4.49027e+07	53.9051
2011-07-11	24.2273	0	2.74601e+09	103.822	8.16937	2899.12	5163.1		0.500521				5.18415	2	2275.07	3793.88			-118.541	36.289	173	88.9	3.00285	1.01053e+06	1105.05
2011-07-12	82.2246	10.2839	9.2221e+09	792.938	33.1794	1918.51	3711.11	3171.61					5.18415	2	2508.75				-118.541	36.289	173	88.9	0.739229	3.39373e+06	272.036
2011-07-13	99.9182	38.0992	1.11894e+10	978.642	21.1045	2435.07	5490.99	2627.16	0.589108				5.18415	2	2500.64	4588.88			-118.541	36.289	173	88.9	0.860856	4.11771e+06	316.795
2011-07-14	79.5802	19.1965	8.95398e+09	614.856	16.0694	1745.55	2906.9		0.00180454				5.18415	2	2672.6	2667.78			-118.541	36.289	173	88.9	0.81036	3.29507e+06	298.213
2011-07-15	241.433	80.312	2.70953e+10	1771.44	26.5125	1351.54							5.18415	2	2363.26				-118.541	36.289	173	88.9	0.237012	9.97107e+06	87.2204
2011-07-20	277.035	146.716	3.10956e+10	1868.99	44.3156		2857.87					1480.17	5.18415	2		3855.01			-118.541	36.289	173	88.9	0.336883	1.14432e+07	123.973
2011-07-21	198.951	31.5372	2.23287e+10	1241.65	33.113	1434.3							5.18415	2	2198.3				-118.541	36.289	173	88.9	0.267533	8.21696e+06	98.452
2011-07-25	355.718	7.93326	3.99357e+10	2335.51	85.2646	2608.57		2904.29			3920.74		5.18415	2	5927.38				-118.541	36.289	173	88.9	0.403324	1.46963e+07	148.423
2011-07-26	350.632	0.783532	3.93808e+10	3468.56	92.7198		2272.68	3402.78		689.08		4130.72	5.18415	2		6700.27			-118.541	36.289	173	88.9	0.462338	1.44921e+07	170.14
2011-07-27	1222.12	0	1.37167e+11	4605.55	164.084	686.7	1493.64		0.747247		1085.82	2943.59	5.18415	2	2187.51	4797.13			-118.541	36.289	173	88.9	0.0691856	5.04776e+07	25.4603
2011-07-28	744.643	0	8.35645e+10	4073.27	108.675	1439.76							5.18415	2	1761.87				-118.541	36.289	173	88.9	0.0572934	3.07517e+07	21.084
2011-06-19	134.097	143.731	1.34003e+10	480.372	260.192	1946.53	1259.15	514.617	0.589245				4.33091	1	1801.76	981.695			-103.078	57.973	72	95.8	0.282222	4.93133e+06	103.858
2011-06-20	744.007	2304.05	8.90968e+10	5905.36	2084.79	6942.97	5793.91		0.470649				4.33091	1	5981.86	3702.82			-103.078	57.973	72	95.8	0.147688	3.27876e+07	54.3492
2011-06-21	2359.86	7069.31	2.76784e+11	6519.61	3998.37	10459.3				964.588	1299.97		4.33091	1	9664.37				-103.078	57.973	72	95.8	0.0948824	1.01856e+08	34.9167
2011-05-26	65.9953	0	2.29921e+09	71.0749	6.48598					330.933	1303.03		3.61789	1	1303.03				-154.563	65.567	63	98	1.54002	846111	566.729
2011-05-28	144.303	0	5.00577e+09	69.9826	7.75405	2090.04	2560.22	2689.06	0.139751		2119.81	1592.08	3.61789	1	3315.77	2882.65			-154.563	65.567	63	98	1.68241	1.84212e+06	619.127
2011-05-29	1406.32	0	4.88283e+10	1134.51	47.494	3580.45	1886.12		0.394771	336.663	1159.15	1389.13	3.61789	1	4466.2	2993.72			-154.563	65.567	63	98	0.20758	1.79688e+07	76.3893
2011-05-30	685.792	245.465	2.38123e+10	568.611	56.3339					1046.41	3775.93		3.61789	1	4621.08				-154.563	65.567	63	98	0.527345	8.76291e+06	194.063
2011-06-22	821.919	2383.3	8.72639e+10	5328.21	5232	9496.08	4945.3		0.571319				7.25185	1	8067.9	4482.7			-89.921	51.0785	76	67.35	0.195412	3.21131e+07	71.9118
2011-06-23	408.683	1136.46	4.3051e+10	3253.5	933.959					114.684	2466.3		7.25185	1	2882.55				-89.921	51.0785	76	67.35	0.181948	1.58428e+07	66.9567
2011-06-24	1280.34	3127.66	1.31911e+11	7708.46	8657.09		12435.7						7.25185	1		9045.61			-89.921	51.0785	76	67.35	0.186341	4.85433e+07	68.5735
2011-06-25	146.016	336.909	1.49166e+10	845.48	1422.59						4318.83		7.25185	1	6948.13				-89.921	51.0785	76	67.35	1.26576	5.4893e+06	465.799
2011-08-22	182.409	177.147	2.07066e+10	1537.78	436.044	16755.6	7088.74	1425.21	0.885048				4.42388	2	14648.2	5660.94			-114.391	45.517	61	77	1.33262	7.62002e+06	490.404
2011-08-23	908.091	874.249	1.03178e+11	7112.65	2088.79	149.926	573.324		0.169243	206.656	2216.09	3283.19	4.42388	2	3551.46	4208.08			-114.391	45.517	61	77	0.102181	3.79695e+07	37.6027
2011-08-24	176.793	93.0142	2.0054e+10	939.202	92.287								4.42388	2	114.208				-114.391	45.517	61	77	0.0154756	7.37988e+06	5.69501
2012-07-30	1785.7	1750.95	2.02818e+11	8794.9	79.1865	4921.78							2.95459	2	4221.71		3.46421	0.259252	-114.97	45.336	6491	94.8	0.0565633	7.46369e+07	20.8153
2012-08-06	3166.85	1994.05	2.47444e+11	11388.7	329.732	7778.15	7550.81				2096.07	1600.04	2.95459	2	13291.9		3.46421	0.259252	-114.97	45.336	6491	94.8	0.14597	9.10594e+07	53.7168
2012-08-07	9106.88	4085.55	6.04925e+11	21290.4	713.262	2447.97				2093.01	3923.23		2.95459	2	6504.21		3.46421	0.259252	-114.97	45.336	6491	94.8	0.0292176	2.22612e+08	10.7521
2012-08-11	4059.68	2535.96	3.15774e+11	18276	931.123	7556.32	25112.2	20500.1			1014.98	3691.63	2.95459	2	6979.24		3.46421	0.259252	-114.97	45.336	6491	94.8	0.0600598	1.16205e+08	22.102
2012-08-12	3109	2091.62	2.55793e+11	14112.3	897.522	13911.7	8051.4		0.602294	2226.69	4856	2487.69	2.95459	2	22190	11918.4	3.46421	0.259252	-114.97	45.336	6491	94.8	0.181173	9.41319e+07	66.6717
2012-08-13	13603.5	11094.2	1.32004e+12	53542.5	3279.37	21930.2				1778.8	7352.21		2.95459	2	24430.8		3.46421	0.259252	-114.97	45.336	6491	94.8	0.0502926	4.85774e+08	18.5077
2012-08-16	11958.5	6932.17	8.67057e+11	36062.8	2552.54	11284.2					6548.49		2.95459	2	16606.5		3.46421	0.259252	-114.97	45.336	6491	94.8	0.0520453	3.19077e+08	19.1527
2012-08-19	3787.63	1908.95	2.46803e+11	16481.9	381.271	9020.43	9474.82						2.95459	2		14382.3	3.46421	0.259252	-114.97	45.336	6491	94.8	0.158354	9.08236e+07	58.2744
2012-08-20	1000.76	597.217	7.2688e+10	3998.53	303.519	2410.51		1056.42		1057	1193.35		2.95459	2	5875.29		3.46421	0.259252	-114.97	45.336	6491	94.8	0.219644	2.67492e+07	80.8289
2012-08-21	1295.45	829.382	1.01684e+11	5995.67	531.504		1144.61	7023.54		2538.82		1380.71	2.95459	2		2407.6	3.46421	0.259252	-114.97	45.336	6491	94.8	0.0643402	3.74199e+07	23.6772
2012-08-22	3988.68	1896.6	2.53541e+11	13135.2	1029.88	7038.32	8894.65		0.39572		1732.86	3079.03	2.95459	2	7114.92	10624.9	3.46421	0.259252	-114.97	45.336	6491	94.8	0.0950658	9.3303e+07	34.9842
2012-08-23	8531.66	5696.68	7.05761e+11	41721.7	2097.71	26854.4				723.347	5052.18		2.95459	2	23830.5		3.46421	0.259252	-114.97	45.336	6491	94.8	0.0917548	2.5972e+08	33.7658
2012-08-25	8611.09	5594.31	6.78955e+11	35523.5	2615.59	10744.8	16255.7	6202.33	0.386054	1356.76	4860.55	7126.41	2.95459	2	14903.3	22032.9	3.46421	0.259252	-114.97	45.336	6491	94.8	0.0739152	2.49855e+08	27.2008
2012-08-26	5442.55	3076.68	3.76347e+11	20333.6	1115.63	7551.12	4023.98		0.671602	2676.76	4477.29	2532.3	2.95459	2	14332.9	7126.72	3.46421	0.259252	-114.97	45.336	6491	94.8	0.0774739	1.38496e+08	28.5104
2012-08-27	6632.96	2870.49	3.68981e+11	16884	1637.96	4392				1339.99	3041.18		2.95459	2	7718.73		3.46421	0.259252	-114.97	45.336	6491	94.8	0.0568453	1.35785e+08	20.9191
2012-08-30	7262.65	6161.91	7.27037e+11	32136.4	2499.53	19586.6				764.045	8941.64		2.95459	2	29137.6		3.46421	0.259252	-114.97	45.336	6491	94.8	0.108905	2.6755e+08	40.0771
2012-09-02	1726.57	1510.02	1.7642e+11	11757.5	1617.23	9738.45	14181.2						2.95459	2		11753.6	3.46421	0.259252	-114.97	45.336	6491	94.8	0.18104	6.49226e+07	66.6227
2012-09-03	8697.3	8075.04	9.39087e+11	50352.6	4496.5	23869.6				81.1414	11779.9		2.95459	2	34308.7		3.46421	0.259252	-114.97	45.336	6491	94.8	0.0992773	3.45584e+08	36.5341
2012-09-07	721.6	669.785	8.50018e+10	3993.05	892.04	2880	7139.89	4404.61	0.68397				2.95459	2	2898.37	5911.06	3.46421	0.259252	-114.97	45.336	6491	94.8	0.140813	3.12807e+07	51.819
2012-09-08	2641.53	2044.9	2.4841e+11	14411.7	1677.1	13981.2	21599.3	25822.5	0.221073	620.566	4426.85	3630.27	2.95459	2	16737.9	20898.1	3.46421	0.259252	-114.97	45.336	6491	94.8	0.205853	9.14148e+07	75.754
2012-09-09	9636.35	6806.47	8.30877e+11	37020	2463.58	36834.4	38954.4		0.0580866	2330.05	6747.41	5838.11	2.95459	2	40194.9	42599.5	3.46421	0.259252	-114.97	45.336	6491	94.8	0.13539	3.05763e+08	49.8235
2012-09-10	11203.6	8083.99	9.76225e+11	61689.8	6156.35	19258				3797.05	15797.6		2.95459	2	34516.3		3.46421	0.259252	-114.97	45.336	6491	94.8	0.0960787	3.59251e+08	35.357
2012-09-12	1349.31	1196	1.40564e+11	6869.67	1448.16	1199.94	7173.67	2365.34	1.04622		1494.01	4456.36	2.95459	2	2748.21	8777.38	3.46421	0.259252	-114.97	45.336	6491	94.8	0.111407	5.17276e+07	40.9976
2012-09-13	2919.09	2486.39	2.91786e+11	17579.3	1763.75	14927.4	19310.8		0.0119743				2.95459	2	15989.9	16182.5	3.46421	0.259252	-114.97	45.336	6491	94.8	0.14981	1.07377e+08	55.1299
2012-09-14	11435.1	8785.63	1.04977e+12	50704.7	4688.73	40454				3183.64	9890.53		2.95459	2	45855.1		3.46421	0.259252	-114.97	45.336	6491	94.8	0.118698	3.86316e+08	43.681
2012-09-17	2187.69	1494.43	1.80087e+11	9601.13	1422.62	2879.38		6460.87			2711.84		2.95459	2	5559.52		3.46421	0.259252	-114.97	45.336	6491	94.8	0.0838893	6.62721e+07	30.8713
2012-09-18	1670.73	1083.55	1.32712e+11	6007.4	878.06		4520.85	3394.96		857.368		493.647	2.95459	2		5188.75	3.46421	0.259252	-114.97	45.336	6491	94.8	0.106244	4.88379e+07	39.0979
2012-09-19	4190.33	3255.16	3.86845e+11	24336.1	2782.9	22055.6	24973.3		0.263205		9150.07	13082.1	2.95459	2	25004.6	32583.3	3.46421	0.259252	-114.97	45.336	6491	94.8	0.202263	1.42359e+08	74.4329
2012-09-20	1641.6	1428.2	1.66259e+11	8956.61	1053.93	5638.19		5481.27		3609.51	9814.28		2.95459	2	20422.6		3.46421	0.259252	-114.97	45.336	6491	94.8	0.333794	6.11832e+07	122.836
2012-09-21	4203.1	3465.7	4.0519e+11	26271.2	2947.97		27869.7	28746.9		3872.58		9623.78	2.95459	2		35796.6	3.46421	0.259252	-114.97	45.336	6491	94.8	0.240069	1.4911e+08	88.3453
2012-09-22	2151.85	1698.83	1.97584e+11	13691.7	983.314	11056.6	12744.8		0.116158		6372.91	6781.07	2.95459	2	19504	21909.3	3.46421	0.259252	-114.97	45.336	6491	94.8	0.28478	7.27109e+07	104.799
2012-09-23	1880.47	1721.83	2.01596e+11	14591.9	880.592	4291.6							2.95459	2	4434.72		3.46421	0.259252	-114.97	45.336	6491	94.8	0.0597774	7.41872e+07	21.9981
2012-07-04	31.1865	1082.67	3.9643e+10	4691.48	660.848	1083.36		1522.73					8.33291	1	193.061		4.96953	0.203516	-115.617	59.355	3303	117.2	0.0132337	1.45886e+07	4.86999
2012-07-05	252.589	9688.61	3.60456e+11	24487.3	3452.23		821.898	7128.09					8.33291	1		817.059	4.96953	0.203516	-115.617	59.355	3303	117.2	0.00615962	1.32648e+08	2.26674
2012-07-07	289.777	1142.17	9.64999e+10	5810.38	4380.52	4200.64	10844.2	15399.1	0.756209				8.33291	1	2943.69	6523.15	4.96953	0.203516	-115.617	59.355	3303	117.2	0.133291	3.5512e+07	49.0511
2012-07-08	692.521	5104.49	2.1139e+11	14275.9	4109.31	17093.3	13456.3		0.00894062				8.33291	1	13752.7	13630.3	4.96953	0.203516	-115.617	59.355	3303	117.2	0.176002	7.77917e+07	64.7687
2012-07-09	1163.33	8842.17	3.44545e+11	28187	10781.3	38779.9							8.33291	1	29972.5		4.96953	0.203516	-115.617	59.355	3303	117.2	0.23639	1.26792e+08	86.9916
2012-07-13	7369.33	29047.2	1.07886e+12	61740.4	35798.2	47140.9					13234.5		8.33291	1	54267.1		4.96953	0.203516	-115.617	59.355	3303	117.2	0.136686	3.97021e+08	50.3003
2012-07-15	3465.25	15140.3	5.6033e+11	38973.5	18154.7	13505.1					15535.2		8.33291	1	37492.6		4.96953	0.203516	-115.617	59.355	3303	117.2	0.181825	2.06201e+08	66.9116
2012-07-31	128.777	117.434	1.4165e+10	621.201	248.871		1840.47	3405.05					1.05471	2		1313.14	3.38895	0.425084	-121.279	40.491	2330	85.95	0.25191	5.21271e+06	92.703
2012-08-01	1969.32	2011.75	2.32994e+11	10261.2	407.725	2502.9	1926.81	828.536	0.292392		1240.74	2372.49	1.05471	2	3679.87	4940.08	3.38895	0.425084	-121.279	40.491	2330	85.95	0.0502668	8.5742e+07	18.4982
2012-08-02	1805.75	1829.64	2.11933e+11	9999.38	1057.51	2274.08	5360.09		0.965608	193.979	682.518	1869.4	1.05471	2	2253.57	6460.98	3.38895	0.425084	-121.279	40.491	2330	85.95	0.0558688	7.79912e+07	20.5597
2012-08-03	1378.35	1416.33	1.63992e+11	8878.96	1082.06	2857.81				127.798	1879.81		1.05471	2	5431.32		3.38895	0.425084	-121.279	40.491	2330	85.95	0.0899985	6.0349e+07	33.1194
2012-08-05	3591.43	3589.29	4.15703e+11	12516.5	789.262	2567.12	3431.42	3073.11	0.0261055		1221.68	1029.01	1.05471	2	3953.86	4058.44	3.38895	0.425084	-121.279	40.491	2330	85.95	0.0261876	1.52979e+08	9.63705
2012-08-06	3506.27	2732.39	3.65182e+11	7529.06	796.681	2983.14	940.04		0.872163	89.6893	972.982	494.055	1.05471	2	4511.07	1771.4	3.38895	0.425084	-121.279	40.491	2330	85.95	0.0233745	1.34387e+08	8.60183
2012-08-07	3642.98	3390.67	4.09222e+11	19089.9	1651.33	5258.57	3139.21			84.8078	1231.41	1370.11	1.05471	2	5200.34		3.38895	0.425084	-121.279	40.491	2330	85.95	0.0345323	1.50594e+08	12.7079
2012-08-08	2360.07	1962.9	2.61399e+11	6205.74	523.142	755.255				39.1428	1306.43		1.05471	2	2896.18		3.38895	0.425084	-121.279	40.491	2330	85.95	0.0301075	9.61949e+07	11.0795
2012-08-11	3826.75	3995.56	4.57653e+11	24399.6	2401.35		3333.28			306.113		1054.6	1.05471	2		4103.62	3.38895	0.425084	-121.279	40.491	2330	85.95	0.0243659	1.68416e+08	8.96665
2012-08-12	2016.29	2095.08	2.41187e+11	11912.3	3165.32	5708.05		4175.21			4442.68		1.05471	2	10069.7		3.38895	0.425084	-121.279	40.491	2330	85.95	0.113453	8.87568e+07	41.7507
2012-08-13	2294.27	1647.04	2.11082e+11	9717.66	1104.88		1850.76			856.823		1335.86	1.05471	2		3151.88	3.38895	0.425084	-121.279	40.491	2330	85.95	0.0405761	7.76782e+07	14.932
2012-08-14	10797.4	8065.32	9.93356e+11	14143.6	2223.24	4286.95		4700.06			1716.65		1.05471	2	5220.7		3.38895	0.425084	-121.279	40.491	2330	85.95	0.0142816	3.65555e+08	5.25562
2012-08-15	6151.55	4145.53	5.23206e+11	4323.01	668.306		3319.44			562.87		1086.82	1.05471	2		5051.97	3.38895	0.425084	-121.279	40.491	2330	85.95	0.0262386	1.9254e+08	9.65581
2012-08-16	11260.2	5676.41	7.98747e+11	11373.8	834.578	3564.04		10630			951.766		1.05471	2	3931.24		3.38895	0.425084	-121.279	40.491	2330	85.95	0.0133743	2.93939e+08	4.92175
2012-08-17	8075.11	4598.36	6.1846e+11	6003.05	533.66		4950.93	5417.16		1363.18		4867.39	1.05471	2		10903	3.38895	0.425084	-121.279	40.491	2330	85.95	0.0479054	2.27593e+08	17.6292
2012-08-18	1896.53	1166.9	1.60316e+11	2885.67	340.238	3570.23	4881.06		0.192415		1544.64	1992.12	1.05471	2	5963	7232.51	3.38895	0.425084	-121.279	40.491	2330	85.95	0.111834	5.89962e+07	41.1547
2012-08-19	5393.69	3900.68	5.64401e+11	16529.3	2187.07	7350.06				208.85	4279.57		1.05471	2	10289.4		3.38895	0.425084	-121.279	40.491	2330	85.95	0.04954	2.077e+08	18.2307
2012-08-22	1426.41	1050.85	1.43596e+11	3788.64	848.494	3977.76	2600.11		0.325684	1614.4	2743.25	1463.89	1.05471	2	7852.98	5653.55	3.38895	0.425084	-121.279	40.491	2330	85.95	0.127797	5.28435e+07	47.0295
2012-08-23	1317.89	1277.23	1.54923e+11	7983.08	2672.5	5871.04		4811.32		1089.32	1741.53		1.05471	2	6493.74		3.38895	0.425084	-121.279	40.491	2330	85.95	0.113902	5.70117e+07	41.9159
2012-08-24	902.241	870.077	1.04075e+11	4780.95	967.244		3307.62	2869.25		585.224		1658.93	1.05471	2		5172.51	3.38895	0.425084	-121.279	40.491	2330	85.95	0.135053	3.82997e+07	49.6997
2012-08-25	795.214	758.72	9.09321e+10	5668.12	1960.44	5766.25	2830.62	1629.07	0.391419		2293.67	2031.69	1.05471	2	7589.53	5105.07	3.38895	0.425084	-121.279	40.491	2330	85.95	0.189681	3.3463e+07	69.8027
2012-08-26	1726.41	2142.83	2.55372e+11	16250.6	3533.67	4669.14	2116.37		0.398029	1602.35	3949.56	3528.75	1.05471	2	7941.89	5305.47	3.38895	0.425084	-121.279	40.491	2330	85.95	0.0704819	9.3977e+07	25.9374
2012-08-27	857.401	1296.74	1.52365e+11	8883.58	1933.9	2436.68				546.317	1635.95		1.05471	2	4195.32		3.38895	0.425084	-121.279	40.491	2330	85.95	0.0748227	5.60702e+07	27.5348
2012-09-01	166.704	319.007	3.9744e+10	2404.59	670.803	328.55	27.2156	86.9272	0.0194699	343.278	405.445	164.416	1.05471	2	1918.12	1881.13	3.38895	0.425084	-121.279	40.491	2330	85.95	0.129882	1.46258e+07	47.7965
2012-09-02	105.017	207.795	2.68309e+10	1800.03	534.563				0.244663	234.5	122.731	147.303	1.05471	2	122.731	156.944	3.38895	0.425084	-121.279	40.491	2330	85.95	0.0141626	9.87377e+06	5.21182
2012-09-03	57.7383	135.004	1.65527e+10	995.076	276.439	676.775				166.251	541.752		1.05471	2	1062.67		3.38895	0.425084	-121.279	40.491	2330	85.95	0.174454	6.09141e+06	64.1989
2012-09-09	288.275	289.654	4.05891e+10	595.968	113.488	3781.05	2573.86		0.492921				1.2723	2	2519.11	1522.91	4.27111	0.220952	-120.473	47.3805	962	78.7	0.135304	1.49368e+07	49.792
2012-09-10	6243.67	5122.36	6.41469e+11	13207	673.485	11624.9				500.591	4505.27		1.2723	2	16080.7		4.27111	0.220952	-120.473	47.3805	962	78.7	0.0681209	2.36061e+08	25.0685
2012-09-15	1807.27	710.007	1.86499e+11	10070.1	774.148	2259.83	2980.77	2115.31	0.0878978		3003.86	2726.4	1.2723	2	5177.21	5653.2	4.27111	0.220952	-120.473	47.3805	962	78.7	0.0789026	6.86315e+07	29.0361
2012-09-16	673.534	170.419	7.06466e+10	4339.43	261.248	872.694	382.206	381.951	0.679142	1005.61	970.244	427.308	1.2723	2	1983.86	978.072	4.27111	0.220952	-120.473	47.3805	962	78.7	0.0569647	2.5998e+07	20.963
2012-09-17	642.772	205.992	6.16757e+10	3618.84	348.15	235.949	654.922	2489.99	1.17975	461.023	137.073	739.717	1.2723	2	362.968	1407.07	4.27111	0.220952	-120.473	47.3805	962	78.7	0.0389934	2.26967e+07	14.3496
2012-09-18	909.88	78.4172	9.56171e+10	5626.08	288.451	2740.36	1918.35		0.210242	248.351	1282.1	1081.21	1.2723	2	3767.26	3050.56	4.27111	0.220952	-120.473	47.3805	962	78.7	0.0968795	3.51871e+07	35.6517
2012-09-19	9233.01	1480.36	9.95556e+11	16703.2	1614.33	5468.51				1077.78	2129.16		1.2723	2	6689.83		4.27111	0.220952	-120.473	47.3805	962	78.7	0.01826	3.66364e+08	6.71969
2012-09-25	312.365	94.9053	3.39359e+10	2290.41	134.733						2866.82		1.2723	2	3035.05		4.27111	0.220952	-120.473	47.3805	962	78.7	0.24303	1.24884e+07	89.4349
2012-07-20	14.0118	125.223	9.38788e+09	1132.88	618.19		630.045	536.669					43.1548	1		440.107			-119.563	60.068	103	69.6	0.127392	3.45474e+06	46.8803
2012-07-21	44.1471	331.636	3.01684e+10	3577.38	1684.41	2911.48	4351.76		0.01616		800.666	810.457	43.1548	1	3006.2	3055.18			-119.563	60.068	103	69.6	0.272987	1.1102e+07	100.459
2012-07-22	59.025	406.079	3.80139e+10	3068.75	2771.12	2678.16							43.1548	1	3951.97				-119.563	60.068	103	69.6	0.282503	1.39891e+07	103.961
2012-07-26	82.17	338.472	2.8418e+10	3008.04	1910.35	2333.84							43.1548	1	1960.31				-119.563	60.068	103	69.6	0.187449	1.04578e+07	68.9813
2012-08-19	3579.29	916.939	1.38179e+11	2783.47	849.649	922.471	1308.46	1150.8	0.206879	111.722	572.169	629.217	0.826812	2	1386.08	1705.91			-123.064	39.888	279	69.9	0.0304031	5.08499e+07	11.1884
2012-08-20	669.764	171.809	2.58686e+10	442.643	285.773	746.572	873.739	653.65	0.0356764				0.826812	2	778.645	806.928			-123.064	39.888	279	69.9	0.0832789	9.51965e+06	30.6466
2012-08-21	2981.95	763.898	1.15124e+11	2843.13	1270.64	1212.55	2181.69	1707.61	0.562768	293.627	745.89	1271.19	0.826812	2	1924.93	3432.39			-123.064	39.888	279	69.9	0.0632272	4.23656e+07	23.2676
2012-08-22	1435.48	367.616	5.54063e+10	1510.5	421.963	1403.95	1175.82		0.174	27.0229	647.421	360.542	0.826812	2	2040.56	1713.92			-123.064	39.888	279	69.9	0.0920687	2.03895e+07	33.8813
2012-08-23	2650.83	679.021	1.02334e+11	964.578	798.024	830.301		2052.16					0.826812	2	793.345				-123.064	39.888	279	69.9	0.0210666	3.76589e+07	7.75252
2012-08-24	700.145	185.535	2.75859e+10	983.128	453.327		1687.89	1162.93		20.2039		868.528	0.826812	2		2539.79			-123.064	39.888	279	69.9	0.250186	1.01516e+07	92.0685
2012-08-25	924.535	250.804	3.69265e+10	2632.79	647.124	2247.36	1950.97	1146.82	0.198139		522.005	517.753	0.826812	2	2794.63	2290.82			-123.064	39.888	279	69.9	0.187117	1.35889e+07	68.8591
2012-08-26	1770.71	488.536	7.14568e+10	878.019	930.435	360.395	699.195	560.674	0.309801	11.2494	154.539	239.458	0.826812	2	721.75	986.332			-123.064	39.888	279	69.9	0.0324779	2.62961e+07	11.9519
2012-08-27	635.823	173.117	2.54539e+10	86.2838	447.705	798.372	660.542		0.221691				0.826812	2	885.731	708.966			-123.064	39.888	279	69.9	0.0851227	9.36705e+06	31.3251
2012-08-28	1128.03	320.835	4.63756e+10	390.426	761.493	1277.28				145.192	842.323		0.826812	2	2102.91				-123.064	39.888	279	69.9	0.123221	1.70662e+07	45.3451
2012-08-30	1792.05	908.115	1.0908e+11	9262.77	807.637		3247.86					2967.4	0.826812	2		6075.94			-123.064	39.888	279	69.9	0.151363	4.01414e+07	55.7017
2012-08-31	574.704	247.91	3.11304e+10	634.781	344.509	348.377					212.592		0.826812	2	996.43				-123.064	39.888	279	69.9	0.0869789	1.1456e+07	32.0082
2012-06-27	6869.65	765.313	7.20057e+11	11037.8	781.744	5435.96				156.834	1335.01		1.24303	2	7008.89				-110.514	42.503	351	210.9	0.0264505	2.64981e+08	9.7338
2012-06-30	697.519	314.243	7.3107e+10	3742.83	133.06	694.883					375.372		1.24303	2	1285.51				-110.514	42.503	351	210.9	0.0477824	2.69034e+07	17.5839
2013-06-20	96.1	279.865	1.30393e+10	1804.94	524.935	757.059	7441.09		1.53986				3.64674	1	744.649	5728.64			-101.47	58.439	733	101.4	0.674516	4.79847e+06	248.222
2013-06-21	648.851	1922.38	7.14775e+10	4895.48	878.847	2010.56				87.3837	2755.06		3.64674	1	5814.48				-101.47	58.439	733	101.4	0.221052	2.63037e+07	81.347
2013-06-25	1329.75	4129.68	1.61686e+11	7572.77	1944.16	1929.68	2581.12	1327.49				941.542	3.64674	1		4229.89			-101.47	58.439	733	101.4	0.0710902	5.95004e+07	26.1612
2013-06-26	2321.13	7289.84	2.82983e+11	10524.2	2610.47	9807.59	5582.11	4451.63	0.287012	1576.09	4393.64	3629.12	3.64674	1	11372.7	8518.23			-101.47	58.439	733	101.4	0.0955031	1.04138e+08	35.1451
2013-06-27	361.358	1135.28	5.15635e+10	3751.15	888.036	1147.07	965.052	988.389	0.0902671	4683.31	909.196	662.416	3.64674	1	2686.24	2454.23			-101.47	58.439	733	101.4	0.135451	1.89754e+07	49.846
2013-06-28	278.296	1728.29	7.62821e+10	5308.04	1379.13	3797.42	4760.64		0.240339				3.64674	1	3139.8	3997.49			-101.47	58.439	733	101.4	0.127125	2.80718e+07	46.7822
2013-06-29	2151.24	7345.03	2.93529e+11	18201	4243.77	4050.19				734.839	1044.74		3.64674	1	4920.25				-101.47	58.439	733	101.4	0.04555	1.08019e+08	16.7624
2013-08-08	91.8449	1491.69	5.46133e+10	825.704	498.915	2768.09	1300.36	152.243	0.62699				2.61194	1	1907.14	996.775			-125.066	64.664	474	94.35	0.072245	2.00977e+07	26.5861
2013-08-09	597.683	3223.82	1.18033e+11	1505.01	1767.05	5948.44	6567.18	4228.66	0.00200847	1175.4	2151.93	2229.23	2.61194	1	6452.79	6465.76			-125.066	64.664	474	94.35	0.148707	4.34362e+07	54.7242
2013-08-10	147.043	802.939	2.94003e+10	258.326	487.705	40.2397	322.143		0.0472353	459.652	139.826	502.323	2.61194	1	2633.04	2511.54			-125.066	64.664	474	94.35	0.23775	1.08193e+07	87.4919
2013-08-11	2171.7	2257.15	8.26454e+10	1066.26	1370.9	1154.94	4663.49			24.7111	469.817	998.856	2.61194	1	1343.64				-125.066	64.664	474	94.35	0.0441791	3.04135e+07	16.2579
2013-08-12	1108.78	2976.44	1.08987e+11	2124.29	1579.32	8347.32				467.829	827.092		2.61194	1	8343.54				-125.066	64.664	474	94.35	0.208031	4.01072e+07	76.5555
2013-08-11	735.824	302.235	3.59099e+10	3667.74	234.392	632.239	830.929	3675.56	0.00906523				1.68072	2	615.173	620.775			-123.459	41.043	379	90.5	0.0467637	1.32148e+07	17.209
2013-08-12	1256.59	516.813	6.12726e+10	3802.29	544.45	1079.05	4231.49		1.02493	336.155	1031.86	2310.27	1.68072	2	2119.92	6576.59			-123.459	41.043	379	90.5	0.192842	2.25483e+07	70.9657
2013-08-13	2287.45	962.04	1.11578e+11	8903.3	1107.82	2711.1		2219.62		407.649	1937.8		1.68072	2	4716.39				-123.459	41.043	379	90.5	0.114864	4.10606e+07	42.27
2013-08-14	3173.46	1237.07	1.54819e+11	8915.57	972.851		2676.57	4934.16		127.844		561.261	1.68072	2		3074.02			-123.459	41.043	379	90.5	0.0539555	5.69733e+07	19.8556
2013-08-15	2240.27	929.741	1.09039e+11	7175.1	1347.71	3642.72	3673.24	1901.13	0.387218		887.346	1861.41	1.68072	2	3980.1	5891.29			-123.459	41.043	379	90.5	0.123004	4.01262e+07	45.2655
2013-08-16	873.746	343.424	4.13076e+10	1870.94	356.648	872.357	426.554		0.540085	140.445	621.158	513.232	1.68072	2	1841.13	1058.19			-123.459	41.043	379	90.5	0.0953649	1.52012e+07	35.0943
2013-08-17	1347.63	537.643	6.5594e+10	5281.44	850.452	1045.22				77.0288	693.82		1.68072	2	1672.24				-123.459	41.043	379	90.5	0.0692767	2.41386e+07	25.4938
2013-06-30	2518.28	7576.25	2.78579e+11	10138.2	1781.24	2535.1							2.79682	1	1641.78				-124.908	60.221	670	176.2	0.0160147	1.02517e+08	5.8934
2013-07-02	447.123	2564.54	8.48497e+10	4790.45	1970.07	18181.6	26259.8		0.508301				2.79682	1	9962	16751.2			-124.908	60.221	670	176.2	0.427757	3.12247e+07	157.415
2013-07-03	17567.6	53529.1	1.90024e+12	44535.6	25151.6	41649.1				7776.27	11418.1		2.79682	1	49633.3				-124.908	60.221	670	176.2	0.0709767	6.9929e+08	26.1194
2013-06-27	2274.59	7990.57	2.88387e+11	7316.37	7030.81	9834.18	4590.23	11857.5	0.861318				3.60335	1	9185.8	3655.55	4.53141	0.26924	-77.604	52.394	3767	153.1	0.0605002	1.06126e+08	22.2641
2013-06-28	10148.6	38937.9	1.33935e+12	31268.3	17975.1	36442.2	35767.7	21553.6	0.164538	1522	5197.24	2013.3	3.60335	1	38762.4	32869.3	4.53141	0.26924	-77.604	52.394	3767	153.1	0.0726666	4.92879e+08	26.7413
2013-06-29	5844.59	32627.1	7.54176e+11	35271	12459.4	9259.06	10448.7		0.236713	526.225	2110.69	1529.68	3.60335	1	15058.9	11871.5	4.53141	0.26924	-77.604	52.394	3767	153.1	0.0485169	2.77537e+08	17.8542
2013-06-30	3203.7	27962.2	6.10262e+11	9431.97	13076.1	11512.4				1243.66	5991.49		3.60335	1	18316.9		4.53141	0.26924	-77.604	52.394	3767	153.1	0.0815621	2.24577e+08	30.0148
2013-07-02	2996.73	19160.4	5.92297e+11	16471.7	12765.3	20667.2					3164.42		3.60335	1	22268.3		4.53141	0.26924	-77.604	52.394	3767	153.1	0.102164	2.17965e+08	37.5965
2013-07-13	750.914	677.834	7.59607e+10	3626.31	684.276	742.696	367.246	186.614					4.42426	1		7183.92			-135.797	61.926	345	108.4	0.256995	2.79536e+07	94.5741
2013-07-14	1406.93	824.691	1.4227e+11	4410.73	1206.2	10030.8	6304.86	9089.62	0.287308	50.146	233.201	577.508	4.42426	1	4860.29	3639.29			-135.797	61.926	345	108.4	0.0811721	5.23553e+07	29.8713
2013-07-15	4513.45	3671.3	4.41526e+11	18428.7	3742.94	15204.7	13138.6		0.161566	510.192	6748.4	6069.34	4.42426	1	19538.4	16617.6			-135.797	61.926	345	108.4	0.111262	1.62481e+08	40.9445
2013-07-16	1949.65	889.813	1.93632e+11	6105.47	1272.22					123.836	7657.64		4.42426	1	12940.4				-135.797	61.926	345	108.4	0.181602	7.12567e+07	66.8295
2013-08-11	17095.3	4402.26	9.17667e+11	22709.5	324.591	6320.61	6407.31		0.0660994	1630.21	5575.89	6292.6	0.738122	2	18715.7	19995.1	3.33668	0.634756	-115.204	43.532	2060	124.5	0.057315	3.37701e+08	21.0919
2013-08-12	14287	4042.9	7.04038e+11	21857.8	700.091	3516.51		7443.07		2017.59	4186.69		0.738122	2	7683.23		3.33668	0.634756	-115.204	43.532	2060	124.5	0.0296552	2.59086e+08	10.9131
2013-08-13	7186.76	2209.74	3.6673e+11	18929.1	378.583		2193.05			1126.83		3640.89	0.738122	2		6646.04	3.33668	0.634756	-115.204	43.532	2060	124.5	0.0492458	1.34956e+08	18.1225
2013-08-14	9782.98	4619.28	6.35716e+11	33604.9	728.033	6762.37	13131.2	14905.2			1872.61	7668.47	0.738122	2	6637.28		3.33668	0.634756	-115.204	43.532	2060	124.5	0.0283713	2.33944e+08	10.4406
2013-08-15	10086.2	6691.28	8.24659e+11	36743.5	463.147	14704.2	20540.7	29778.2	0.162935	767.379	6307.35	7337.66	0.738122	2	23353.1	27495.6	3.33668	0.634756	-115.204	43.532	2060	124.5	0.0837776	3.03475e+08	30.8301
2013-06-29	1431.8	1122.75	4.11135e+10	2663.21	760.543	3807.57	1063.3		1.38967				3.80731	1	3456.77	622.414			-111.678	60.572	461	72.3	0.134807	1.51298e+07	49.6088
2013-06-30	3210.18	1824.85	9.82997e+10	5361.29	483.15	4502.2				1718.04	2756.61		3.80731	1	6696.96				-111.678	60.572	461	72.3	0.185131	3.61743e+07	68.128
2013-07-03	1550.21	2545.55	9.54605e+10	6287.32	1804.13	7895.84					4847.62		3.80731	1	11099.8				-111.678	60.572	461	72.3	0.315969	3.51295e+07	116.277
2013-07-05	386.482	607.834	2.26453e+10	2054.72	240.148		5001.97	2380.92				6575.64	3.80731	1		12132.1			-111.678	60.572	461	72.3	1.45583	8.33345e+06	535.745
2013-07-06	3023.66	2371.99	1.25849e+11	7486.58	1810.3	10107.9	10781.5	14390.4	0.00607156		1759.4	1734.68	3.80731	1	11249.6	11318.1			-111.678	60.572	461	72.3	0.243645	4.63125e+07	89.6615
2013-07-07	2140.41	3326.68	1.28707e+11	7618.26	2939.62	6504.6	9266		0.438417	1378.2	1286.05	1902.53	3.80731	1	7649.54	11944.8			-111.678	60.572	461	72.3	0.206847	4.73641e+07	76.1199
2013-07-08	1771.27	3526.83	1.25415e+11	7467.21	2188.76	7609.67				1838.67	2442.58		3.80731	1	11356.7				-111.678	60.572	461	72.3	0.246068	4.61527e+07	90.553
2013-06-25	7361.48	12445.6	4.56354e+11	8886.61	6462.65	4985.93	12973.9	3824.28		16.3928	516.716	814.285	2.45809	1		11490.3			-95.747	58.004	1167	110.1	0.0684199	1.67938e+08	25.1785
2013-06-26	3684.37	8045.12	2.97465e+11	6704.94	5571.44	14248.4	6429.21	7239.86	0.950715				2.45809	1	14709.5	5230.76			-95.747	58.004	1167	110.1	0.0910788	1.09467e+08	33.517
2013-06-27	2479.48	5674.51	2.13261e+11	5916.68	4638.18	9581.73	7735.07	8362.97	0.282158	3519.03	7099.31	4494.62	2.45809	1	17066	12846			-95.747	58.004	1167	110.1	0.190571	7.848e+07	70.1301
2013-06-28	1058.78	2357.95	8.72226e+10	1801.04	2054.16	3211.8	2641.12	2641.47	0.237056				2.45809	1	3667.98	2890.61			-95.747	58.004	1167	110.1	0.102165	3.20979e+07	37.5969
2013-06-29	8039.61	16706.9	6.1272e+11	12518	8512.51	15470.4	32544.3		0.606612	604.169	1197.48	980.403	2.45809	1	14459.9	27050.2			-95.747	58.004	1167	110.1	0.0920481	2.25481e+08	33.8737
2013-06-30	11927.5	20615	7.88848e+11	13946.3	8598.55	30794.1				1907.44	2883.47		2.45809	1	29086.2				-95.747	58.004	1167	110.1	0.100195	2.90296e+08	36.8717
2013-08-04	86.0789	398.915	1.62667e+10	944.518	164.754	190.077							3.37605	1	101.763				-120.331	61.266	635	84.2	0.0169998	5.98614e+06	6.25593
2013-08-07	1800.61	8028.74	3.43459e+11	15395	5563.12	3193.38	4235.95		0.256369		1129.69	2286.31	3.37605	1	5025.34	6503.11			-120.331	61.266	635	84.2	0.0456056	1.26393e+08	16.7829
2013-08-08	849.177	3054.33	1.71054e+11	9699.9	3297.27	3990.54				452.776	1626.02		3.37605	1	5611.31				-120.331	61.266	635	84.2	0.089142	6.2948e+07	32.8043
2013-08-12	168.833	127.461	2.96913e+10	1783.83	923.129	1342.71							3.37605	1	881.566				-120.331	61.266	635	84.2	0.0806823	1.09264e+07	29.6911
2013-06-27	961.811	1938.98	7.09922e+10	524.532	791.559	3746.09	6354.84		0.494154				3.49643	1	3667.11	6073.88			-69.702	52.554	1301	94.8	0.186429	2.61251e+07	68.606
2013-06-28	4429.44	11312.5	4.15111e+11	3830.99	5986.98	15904.6				608.214	1101.4		3.49643	1	15159.9				-69.702	52.554	1301	94.8	0.0992391	1.52761e+08	36.52
2013-08-09	2266.32	2560.02	9.63183e+10	3354.16	945.525	8019.01	8060.93		0.00864772				1.41156	1	6718.95	6777.3	4.03828	0.341902	-101.628	58.276	1123	96.4	0.190382	3.54451e+07	70.0607
2013-08-10	6930.1	9004.06	3.3307e+11	21032.8	3860.43	8563.51	4909.33	9171.15		2113.72	5935.08	1449.91	1.41156	1	14565.2		4.03828	0.341902	-101.628	58.276	1123	96.4	0.118832	1.2257e+08	43.7301
2013-08-11	15694.6	21153.7	9.52539e+11	29968.9	9408.85	7564.52	9436.95	13283.6	0.158569	319.428	1827.07	1515.69	1.41156	1	9757.01	11437.4	4.03828	0.341902	-101.628	58.276	1123	96.4	0.0302316	3.50534e+08	11.1252
2013-08-12	10973.5	20401.7	8.33747e+11	31745.6	10838.4	11273.8	15762.6		0.279201	1121.83	2424.82	3263.48	1.41156	1	12940.3	17139.4	4.03828	0.341902	-101.628	58.276	1123	96.4	0.0490187	3.06819e+08	18.0389
2013-08-13	8068.31	20136.6	7.84155e+11	22173.4	12409.1	15771.2	20398.9			1497.34	4376.76	5166	1.41156	1	20225.7		4.03828	0.341902	-101.628	58.276	1123	96.4	0.0700897	2.88569e+08	25.793
2013-08-14	6431.94	19403.4	7.45264e+11	31639.4	12408.3	17581.8				831.932	1488.48		1.41156	1	20557.5		4.03828	0.341902	-101.628	58.276	1123	96.4	0.074957	2.74257e+08	27.5842
2013-08-04	196.756	666.32	2.43988e+10	612.156	255.608	310.585	885.446	1502.7	0.655605				2.23938	1	261.403	516.354			-115.531	61.885	656	112.75	0.0433109	8.97877e+06	15.9384
2013-08-05	1854.83	9272.55	3.39506e+11	9219.33	601.574	1338.69	2599.32		0.816699	97.1853	948.905	2391.41	2.23938	1	2087.29	4968.53			-115.531	61.885	656	112.75	0.0282372	1.24938e+08	10.3913
2013-08-06	651.257	3314.65	1.21359e+11	2417.37	302.035	170.67		99.8779					2.23938	1	735.154				-115.531	61.885	656	112.75	0.0164611	4.46599e+07	6.0577
2013-08-07	226.132	1171.92	4.29078e+10	1183.12	208.065		235.825	17.9549				176.735	2.23938	1		425.473			-115.531	61.885	656	112.75	0.0269456	1.57901e+07	9.91598
2013-08-08	2053.57	10717.4	3.92403e+11	10945.4	676.296	1656.73	2884.8		0.396067				2.23938	1	1149.63	1717.4			-115.531	61.885	656	112.75	0.0099271	1.44404e+08	3.65317
2013-08-09	1590.16	8253.02	3.02178e+11	9198.53	1067.93	3369.23	4851.26	4149.56		185.684	796.181	1713.75	2.23938	1	3808.05				-115.531	61.885	656	112.75	0.0342446	1.11201e+08	12.602
2013-08-10	815.119	4210.15	1.54154e+11	8027.3	1001.44	863.32	1648.22	14983.1	0.30818	93.0008	194.958	193.824	2.23938	1	2809.99	2059.63			-115.531	61.885	656	112.75	0.0429202	5.67287e+07	15.7946
2013-08-11	812.698	4186.7	1.5329e+11	5409.56	1114.72	2629.91	6330.82	6781.24	1.3306				2.23938	1	2302.44	11455.9			-115.531	61.885	656	112.75	0.121948	5.64109e+07	44.8767
2013-08-12	1397.48	7171.81	2.62587e+11	13103.9	1779	2828.45	4574.51		0.520787	421.934	736.674	1112.39	2.23938	1	3909.55	6662.42			-115.531	61.885	656	112.75	0.0547022	9.66321e+07	20.1304
2013-08-13	1812.53	9252.71	3.38777e+11	12866.4	2074.99	5223.78				449.962	433.268		2.23938	1	4377.55				-115.531	61.885	656	112.75	0.0351131	1.2467e+08	12.9216
2013-06-21	1296.11	4299.14	1.57407e+11	7553.84	999.776	8796.84	8256.23		0.0880264				4.62969	1	5907.71	5409.6			-122.952	63.003	73	161.1	0.097688	5.79258e+07	35.9492
2013-06-22	278.814	1052	3.85156e+10	753.473	291.616	519.293							4.62969	1	2880.46				-122.952	63.003	73	161.1	0.203225	1.41738e+07	74.7868
2013-08-02	148.554	340.959	1.24861e+10	121.136	184.654	57.2038	1621.19	59.6842	1.81761				3.79279	1	55.5685	1163.09			-117.269	64.4145	508	68.7	0.132611	4.59488e+06	48.8009
2013-08-03	214.975	456.865	1.65402e+10	141.231	233.805								3.79279	1	399.198				-117.269	64.4145	508	68.7	0.0655843	6.08678e+06	24.135
2013-08-04	838.615	1868.95	6.82954e+10	469.083	856.035	4551.75							3.79279	1	3958.94				-117.269	64.4145	508	68.7	0.157521	2.51327e+07	57.9679
2013-08-06	2349.81	4493.94	1.69134e+11	1181	1523.82	1633.2	8320.38			13.3601	145.567	625.529	3.79279	1	2226.64				-117.269	64.4145	508	68.7	0.0357742	6.22414e+07	13.1649
2013-08-07	966.105	1928.44	8.5993e+10	577.479	1057.46	2530.87	2681.72	1033		73.316	755.666	809.102	3.79279	1	5006.16				-117.269	64.4145	508	68.7	0.158195	3.16454e+07	58.2159
2013-08-08	764.146	1448.92	6.72836e+10	419.74	1079.37	2113.01	2447.63		0.189577	135.065	659.684	436.632	3.79279	1	3023.25	2499.73			-117.269	64.4145	508	68.7	0.111529	2.47604e+07	41.0426
2013-08-09	609.913	1163.16	5.18814e+10	375.656	1110.66	2601.44	5401.27			572.029	1424.31		3.79279	1	4072.18				-117.269	64.4145	508	68.7	0.213288	1.90923e+07	78.4902
2013-08-10	1206.26	2440.87	1.0093e+11	1044	1455.1	6873.62	4366.29	2439.53					3.79279	1	6372.44				-117.269	64.4145	508	68.7	0.171568	3.71424e+07	63.137
2013-08-11	750.336	1758.95	7.61555e+10	1509.49	1540.32	3445.24	3754.15	4781.51	0.0555202				3.79279	1	3985.52	3770.22			-117.269	64.4145	508	68.7	0.138371	2.80252e+07	50.9205
2013-08-12	1393.42	3082.5	1.28332e+11	3192.76	2217.55	3039.21	3547.67		0.18579	829.297	622.641	690.325	3.79279	1	3642.38	4388.4			-117.269	64.4145	508	68.7	0.0850248	4.72261e+07	31.2891
2013-08-13	1023.53	2710.03	1.05554e+11	2510.89	1932.73	4985.88				259.946	225.402		3.79279	1	4694.17				-117.269	64.4145	508	68.7	0.120848	3.88438e+07	44.4719
2013-06-18	1669.32	1320.77	3.52157e+11	6858.15	1608.39	3060.32	2898.95		0.0374139	228.324	1369.97	2059.21	2.27048	1	3532.77	3667.46			-141.541	62.451	155	176.7	0.02778	1.29594e+08	10.223
2013-06-19	324.965	186.877	6.8548e+10	2419.59	571.843	565.559							2.27048	1	1714.02				-141.541	62.451	155	176.7	0.0679476	2.52257e+07	25.0047
2013-08-08	53.268	366.428	1.34146e+10	428.87	190.743		1635.91	1372.49					2.96104	1		1108.61			-106.175	58.1505	690	141.9	0.224571	4.93656e+06	82.6423
2013-08-09	44.2354	393.669	1.37394e+10	712.31	371.436	2089.23	2947.54	2126.06	0.210281				2.96104	1	2367.72	2924.1			-106.175	58.1505	690	141.9	0.52331	5.05611e+06	192.578
2013-08-10	280.754	3989.83	1.45793e+11	4871.12	2148.75	1741.97	3543.05	4297.46	0.300957	743.02	1940.86	2303.49	2.96104	1	3844.46	5206.42			-106.175	58.1505	690	141.9	0.0843483	5.36518e+07	31.0402
2013-08-11	1418.79	12779.1	4.67863e+11	15930.1	5861.72	5710.36	3917.2	5625.46	0.212392	152.306	509.866	445.621	2.96104	1	5710.99	4614.47			-106.175	58.1505	690	141.9	0.0299856	1.72174e+08	11.0347
2013-08-12	2681.17	21423.6	7.85702e+11	24012.3	8128.25	2333.93	7075.69		0.843691	873.319	629.752	1046.94	2.96104	1	3044.62	7487.57			-106.175	58.1505	690	141.9	0.0182131	2.89138e+08	6.70241
2013-08-13	1186.11	11401	4.1248e+11	18851.6	6788.01	6614.49				209.264	873.627		2.96104	1	7393.07				-106.175	58.1505	690	141.9	0.048705	1.51793e+08	17.9234
2013-08-02	69.4829	809.397	2.96332e+10	2144.49	711.42	222.344	315.836		0.499407				2.31057	1	179.863	299.582			-107.742	59.25	589	114	0.0219827	1.0905e+07	8.08965
2013-08-03	441.907	2357.37	8.63174e+10	5949.56	901.522	490.49		1762.51					2.31057	1	299.117				-107.742	59.25	589	114	0.00941661	3.17648e+07	3.46531
2013-08-04	1174.17	5807.03	2.03687e+11	8584.46	3967.87		3189.69						2.31057	1		2752.32			-107.742	59.25	589	114	0.0367187	7.4957e+07	13.5125
2013-08-05	1918.55	9254.3	3.30342e+11	4730.36	3616.49	959.677					1407.43		2.31057	1	3191.68				-107.742	59.25	589	114	0.0262547	1.21566e+08	9.66174
2013-08-08	373.189	1560.05	5.67441e+10	2179.69	1371.8		538.908	640.396					2.31057	1		436.93			-107.742	59.25	589	114	0.0209239	2.08818e+07	7.70001
2013-08-09	233.165	2130.65	7.42329e+10	2999.68	1543.83	1520.62	1669.04	1540.92	0.026304		2830.71	2496.49	2.31057	1	4241.07	4130.96			-107.742	59.25	589	114	0.153234	2.73177e+07	56.3903
2013-08-10	592.186	5930.76	1.05411e+11	3009.44	2207.44	1842.7	1973.89	2082.42	0.0698857	1246.31	909.606	819.591	2.31057	1	2684.94	2503.64			-107.742	59.25	589	114	0.0668785	3.87911e+07	24.6113
2013-08-11	3647.3	22497.2	6.98651e+11	17330	7908.21	4499.75	5683.45	6619.19	0.186564	651.435	943.658	1525.21	2.31057	1	5181.24	6247.32			-107.742	59.25	589	114	0.0222256	2.57104e+08	8.17902
2013-08-12	4077.85	27986.9	1.05259e+12	27368.7	10255.5	8601.22	12258.5		0.193867	1127.01	1422.78	1259	2.31057	1	9685.8	11765.1			-107.742	59.25	589	114	0.0276891	3.87353e+08	10.1896
2013-08-13	4421.23	19845.5	6.45207e+11	17738.3	8991	8840.38				976.012	1724.48		2.31057	1	11150.8				-107.742	59.25	589	114	0.0469635	2.37436e+08	17.2826
2013-08-10	1135.15	1245.35	4.55838e+10	1057.67	414.77	2922.85	5801.19		0.520109				2.82342	1	2085.79	3551.9			-140.171	64.02	161	74.9	0.16804	1.67748e+07	61.8388
2013-08-11	1229.73	1119.16	4.08706e+10	1730.24	823.38	972.138				56.8053	897.43		2.82342	1	3828.53				-140.171	64.02	161	74.9	0.25455	1.50404e+07	93.6743
2013-08-09	141.263	323.301	1.18402e+10	927.886	279.098	339.319	932.849	1980.8	0.818706				1.25636	1	209.25	499.296			-112.178	60.499	331	116.3	0.0813078	4.35719e+06	29.9213
2013-08-10	395.82	1016.6	3.72449e+10	2894.07	323.608	1180.54	1164.69	1757.85	0.300611				1.25636	1	1272.08	1722.12			-112.178	60.499	331	116.3	0.109228	1.37061e+07	40.1961
2013-08-11	5781.89	9514.7	3.48368e+11	18429.4	1914.52	8466.3	8452.74	11199.1	0.0128498				1.25636	1	7213.33	7306.62			-112.178	60.499	331	116.3	0.0566304	1.28199e+08	20.84
2013-08-12	4864.31	10333.4	3.78343e+11	18512.6	2157.81	3046.79	2802.96		0.0506907	908.235	1206.58	1030.51	1.25636	1	4972.77	5231.4			-112.178	60.499	331	116.3	0.036645	1.3923e+08	13.4853
2013-08-13	2263.35	4497.5	1.70387e+11	8434.88	1662.48	10391.1				726.159	880.662		1.25636	1	7118.46				-112.178	60.499	331	116.3	0.113528	6.27025e+07	41.7782
2013-07-19	12.1576	21.3127	2.47168e+09	109.242	9.8523	1044.74							1.69276	2	877.68				-112.984	47.804	196	149.45	0.96493	909579	355.094
2013-07-21	201.833	231.5	2.6928e+10	1494.14	44.1875		1262.78						1.69276	2		1666.2			-112.984	47.804	196	149.45	0.168141	9.90949e+06	61.8761
2013-07-22	898.706	544.005	6.30216e+10	3715.94	71.6503	499.871					324.575		1.69276	2	956.653				-112.984	47.804	196	149.45	0.0412494	2.31919e+07	15.1798
2013-07-24	2075.35	1026.28	1.18865e+11	5808.28	144.212		2025.69			3.3419		641.45	1.69276	2		3003.52			-112.984	47.804	196	149.45	0.0686638	4.37424e+07	25.2683
2013-07-25	1021.78	519.671	6.01681e+10	5985.65	80.0006	633.294	1059.32	1247.47			1820.85		1.69276	2	2746.73				-112.984	47.804	196	149.45	0.124052	2.21419e+07	45.651
2013-07-26	349.933	214.27	2.4798e+10	415.851	19.5188	2151.97	2273.4		0.120747				1.69276	2	2195.26	1945.28			-112.984	47.804	196	149.45	0.226863	9.12566e+06	83.4855
2013-07-27	4289.68	1916.35	3.05413e+11	11625	291.378	6274.57				477.27	1782.82		1.69276	2	7198.63				-112.984	47.804	196	149.45	0.0640493	1.12392e+08	23.5701
2013-08-06	16.3951	422.28	1.54639e+10	647.122	209.464	2931.13	557.06	210.349	1.32431				22.67	1	1616.84	328.635			-118.099	60.6565	70	149.8	0.170934	5.69072e+06	62.9037
2013-08-07	21.6055	541.083	1.98095e+10	1268.68	251.826	140.391	474.708	159.959	0.323084	224.439	147.029	264.034	22.67	1	494.783	685.438			-118.099	60.6565	70	149.8	0.0809492	7.28989e+06	29.7893
2013-08-08	41.0415	1054.67	3.86222e+10	2377.74	305.803	223.712	641.926		0.416378				22.67	1	343.55	524.207			-118.099	60.6565	70	149.8	0.0305269	1.4213e+07	11.2339
2013-08-09	99.0019	2346.69	8.63454e+10	5333.21	865.173	2892.45				63.4412	337.353		22.67	1	2329.77				-118.099	60.6565	70	149.8	0.0733205	3.17751e+07	26.982
2013-06-23	144.215	228.816	8.38041e+09	185.831	451.547	675.815	2011.37	1009.11	0.70196				3.84694	1	376.981	784.712			-150.948	66.793	159	103.1	0.188342	3.08399e+06	69.31
2013-06-24	341.309	538.072	1.97005e+10	475.375	474.187	7558.98	4180.29		0.459342	365.753	1738.99	1340.88	3.84694	1	5657.08	3543.89			-150.948	66.793	159	103.1	0.634567	7.2498e+06	233.521
2013-06-25	1974.66	2626.51	9.61663e+10	3165.57	1647.18	8416.49				501.493	1196.48		3.84694	1	7495.2				-150.948	66.793	159	103.1	0.211794	3.53892e+07	77.94
2013-06-28	873.781	1345.12	4.9253e+10	1170.99	1220.03		6580.28						3.84694	1		3100.27			-150.948	66.793	159	103.1	0.171048	1.81251e+07	62.9457
2013-06-29	473.383	745.906	2.73107e+10	467.204	207.618	5919.57							3.84694	1	6705.46				-150.948	66.793	159	103.1	0.667187	1.00503e+07	245.525
2013-07-26	2280.22	11436.6	4.36694e+11	6001.4	4169.03	9857.89	11502.9		0.345358				7.58006	1	6649.73	9425.6	4.11087	0.16258	-100.384	58.504	301	137.4	0.0500156	1.60703e+08	18.4057
2013-07-27	2924.86	12731.6	4.84033e+11	14040	8269.78	20096.7				10579.2	12940.7		7.58006	1	29379.2		4.11087	0.16258	-100.384	58.504	301	137.4	0.164937	1.78124e+08	60.6967
